# Supplementary material for: Efficacy and Safety of COVID-19 Vaccines: A Systematic Review and Meta-Analysis of Randomized Clinical Trials
Source: Vaccines (Basel). 2021 May 6;9(5):467. doi: 10.3390/vaccines9050467 (PMC8148145; doi:10.3390/vaccines9050467)
Supplement: Supplementary file 1 [file vaccines-09-00467-s001.zip › vaccines-1192470-supplementary.pdf]

## *Supplementary A*

### **Efficacy and safety of COVID-19 Vaccines: a systematic review and meta-analysis of randomized clinical trials**

Ali Pormohammad<sup>1</sup>, Mohammad Zarei<sup>2,3</sup>, Saied Ghorbani<sup>4</sup>, Mehdi Mohammadi<sup>5</sup>, Mohammad Hossein Razizadeh<sup>6</sup>, Raymond J. Turner<sup>7\*</sup>

<sup>1</sup>Department of Biological Sciences, University of Calgary, Calgary, AB, Canada  
[ali.pormohammad@ucalgary.ca](mailto:ali.pormohammad@ucalgary.ca)

<sup>2</sup>John B. Little Center for Radiation Sciences, Harvard T.H. Chan School of Public Health, Boston, MA 02115. [mzarei@hsph.harvard.edu](mailto:mzarei@hsph.harvard.edu)

<sup>3</sup> Harvard Medical School, Boston, Massachusetts, USA. [mzarei@hsph.harvard.edu](mailto:mzarei@hsph.harvard.edu)

<sup>4</sup>Department of Virology, Faculty of Medicine, Iran University of Medical Science, Tehran, Iran.  
[vet.s.ghorbani@gmail.com](mailto:vet.s.ghorbani@gmail.com)

<sup>5</sup>Department of Biological Sciences, University of Calgary, Calgary, AB, Canada  
[mehdi.mohammadiashan@ucalgary.ca](mailto:mehdi.mohammadiashan@ucalgary.ca)

<sup>6</sup>Department of Virology, Faculty of Medicine, Iran University of Medical Science, Tehran, Iran.  
[razizadeh.mh@iums.ac.ir](mailto:razizadeh.mh@iums.ac.ir)

<sup>7</sup>Department of Biological Sciences, University of Calgary, Calgary, AB, Canada  
[turnerr@ucalgary.ca](mailto:turnerr@ucalgary.ca)

#### **\*Corresponding Authors:**

**Raymond J. Turner**, Professor, Department of Biological Sciences, University of Calgary

Phone No: +1 (403) 220-4308 Mail: [turnerr@ucalgary.ca](mailto:turnerr@ucalgary.ca)

**Table S1. Search strategy.**

| <b>ID</b>              | <b>ID Search Terms</b>                  | <b>Results</b> |
|------------------------|-----------------------------------------|----------------|
| <b>Medlin (PubMed)</b> |                                         |                |
| <b>#1</b>              | covid-19 AND vaccine                    | <b>7952</b>    |
| <b>#2</b>              | Sars-cov-2 AND vaccine                  | <b>5736</b>    |
| <b>#3</b>              | covid-19 AND vaccine AND clinical trial | <b>536</b>     |
| <b>#4</b>              | Covid-19 vaccine trials                 | <b>957</b>     |
| <b>Web of Science</b>  |                                         |                |
| <b>#1</b>              | covid-19 AND vaccine                    | <b>3970</b>    |
| <b>#2</b>              | Sars-cov-2 AND vaccine                  | <b>2790</b>    |
| <b>#3</b>              | covid-19 AND vaccine AND clinical trial | <b>582</b>     |
| <b>#4</b>              | Covid-19 vaccine trials                 | <b>783</b>     |
| <b>Scopus</b>          |                                         |                |
| <b>#1</b>              | covid-19 AND vaccine                    | <b>14</b>      |
| <b>#2</b>              | Sars-cov-2 AND vaccine                  | <b>14</b>      |
| <b>#3</b>              | covid-19 AND vaccine AND clinical trial | <b>3955</b>    |
| <b>#4</b>              | Covid-19 vaccine trials                 | <b>29</b>      |
| <b>EMBASE</b>          |                                         |                |
| <b>#1</b>              | covid-19 AND vaccine                    | <b>3213</b>    |
| <b>#2</b>              | Sars-cov-2 AND vaccine                  | <b>2105</b>    |
| <b>#3</b>              | covid-19 AND vaccine AND clinical trial | <b>87</b>      |
| <b>#4</b>              | Covid-19 vaccine trials                 | <b>67</b>      |

**Table S2. Quality assessment of included studies**

| Study            | Randomization                         |                                                       | Blinding                         |                                                  | An account of all patients<br>1 point if the fate of all patients in the trial is known | Quality Score<br>(out of 5) |
|------------------|---------------------------------------|-------------------------------------------------------|----------------------------------|--------------------------------------------------|-----------------------------------------------------------------------------------------|-----------------------------|
|                  | 1 point if randomization is mentioned | 1 point if the method of randomization is appropriate | 1 point if blinding is mentioned | 1 point if the method of blinding is appropriate |                                                                                         |                             |
| Anderson et al.  | 1                                     | 1                                                     | 1                                | 1                                                | 0                                                                                       | 4                           |
| Baden et al.     | 1                                     | 1                                                     | 1                                | 1                                                | 0                                                                                       | 4                           |
| Chu et al.       | 1                                     | 1                                                     | 1                                | 1                                                | 0                                                                                       | 4                           |
| Ella et al.      | 1                                     | 1                                                     | 1                                | 1                                                | 0                                                                                       | 4                           |
| Folegatti et al. | 1                                     | 1                                                     | 1                                | 1                                                | 0                                                                                       | 4                           |
| Jackson et al.   | 1                                     | 1                                                     | 1                                | 1                                                | 0                                                                                       | 4                           |
| Keech et al.     | 1                                     | 1                                                     | 1                                | 1                                                | 0                                                                                       | 4                           |
| Logunov et al.   | 1                                     | 1                                                     | 1                                | 1                                                | 0                                                                                       | 4                           |
| Mulligan et al.  | 1                                     | 1                                                     | 1                                | 1                                                | 0                                                                                       | 4                           |
| Kremsner et al.  | 1                                     | 1                                                     | 1                                | 1                                                | 0                                                                                       | 4                           |
| Polack et al.    | 1                                     | 1                                                     | 1                                | 1                                                | 0                                                                                       | 4                           |
| Ramasamy et al.  | 1                                     | 1                                                     | 1                                | 1                                                | 0                                                                                       | 4                           |
| Richmond et al.  | 1                                     | 1                                                     | 1                                | 1                                                | 1                                                                                       | 5                           |
| Sahin et al.     | 1                                     | 1                                                     | 1                                | 1                                                | 0                                                                                       | 4                           |
| Voysey et al.    | 1                                     | 1                                                     | 1                                | 1                                                | 0                                                                                       | 4                           |
| Walsh et al.     | 1                                     | 1                                                     | 1                                | 1                                                | 0                                                                                       | 4                           |
| Ward et al.      | 1                                     | 1                                                     | 1                                | 1                                                | 0                                                                                       | 4                           |
| Xia et al.       | 1                                     | 1                                                     | 1                                | 1                                                | 0                                                                                       | 4                           |
| Xia et al.       | 1                                     | 1                                                     | 1                                | 1                                                | 0                                                                                       | 4                           |
| Yang et al.      | 1                                     | 1                                                     | 1                                | 1                                                | 0                                                                                       | 4                           |
| Zhang et al.     | 1                                     | 1                                                     | 1                                | 1                                                | 1                                                                                       | 5                           |
| Zhu et al.       | 1                                     | 1                                                     | 1                                | 1                                                | 0                                                                                       | 4                           |
| Sadoff et al.    | 1                                     | 1                                                     | 1                                | 1                                                | 0                                                                                       | 4                           |

**Supplementary Figures:**

A

## Meta Analysis

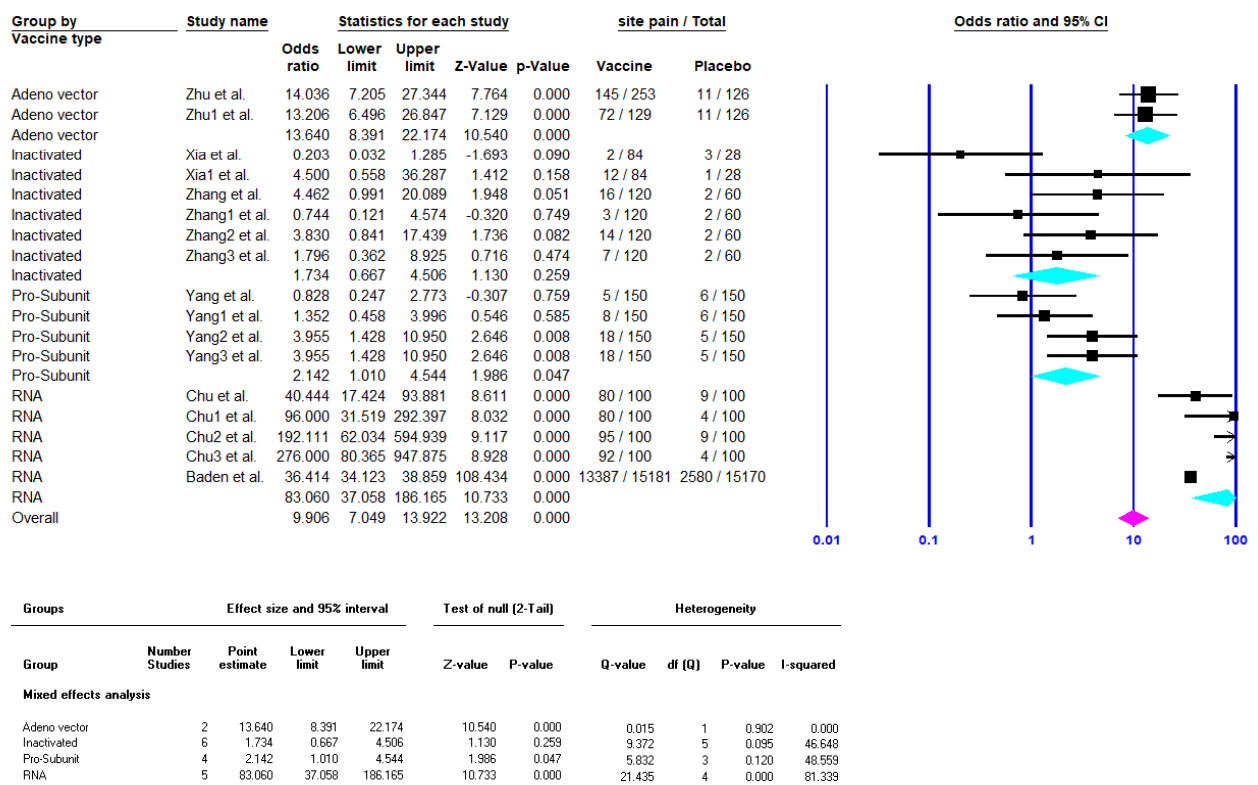

B

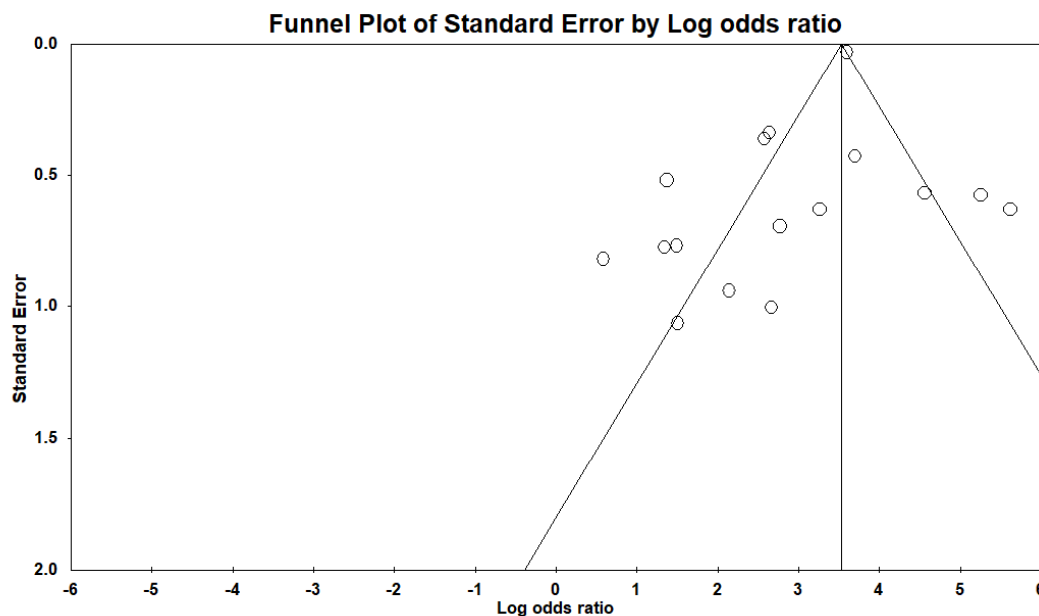

**Fig S1. Meta-analysis A. Forest plot, B. Funnel plot for the injection site pain as a side effect of different COVID 19 vaccine in phase 2/3 RCT.**

## Meta Analysis

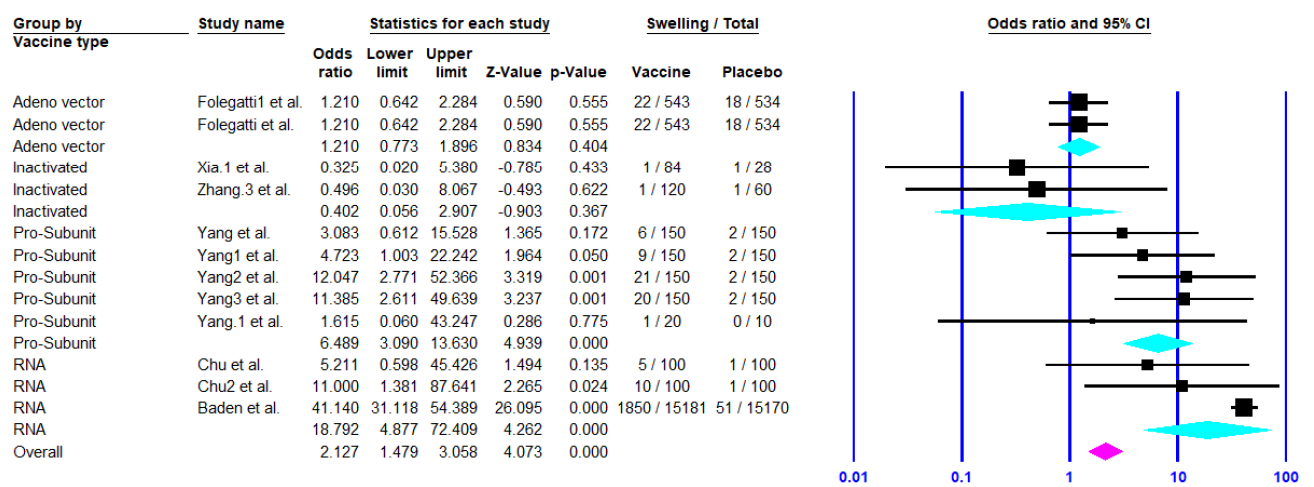

| Groups                 |                | Effect size and 95% interval |             |             | Test of null (2-Tail) |         | Heterogeneity |        |         |           |
|------------------------|----------------|------------------------------|-------------|-------------|-----------------------|---------|---------------|--------|---------|-----------|
| Group                  | Number Studies | Point estimate               | Lower limit | Upper limit | Z-value               | P-value | Q-value       | df (Q) | P-value | I-squared |
| Mixed effects analysis |                |                              |             |             |                       |         |               |        |         |           |
| Adeno vector           | 2              | 1.210                        | 0.773       | 1.896       | 0.834                 | 0.404   | 0.000         | 1      | 1.000   | 0.000     |
| Inactivated            | 2              | 0.402                        | 0.056       | 2.907       | -0.903                | 0.367   | 0.044         | 1      | 0.835   | 0.000     |
| Pro-Subunit            | 5              | 6.489                        | 3.090       | 13.630      | 4.939                 | 0.000   | 2.903         | 4      | 0.574   | 0.000     |
| RNA                    | 3              | 18.792                       | 4.877       | 72.409      | 4.262                 | 0.000   | 4.888         | 2      | 0.087   | 59.086    |

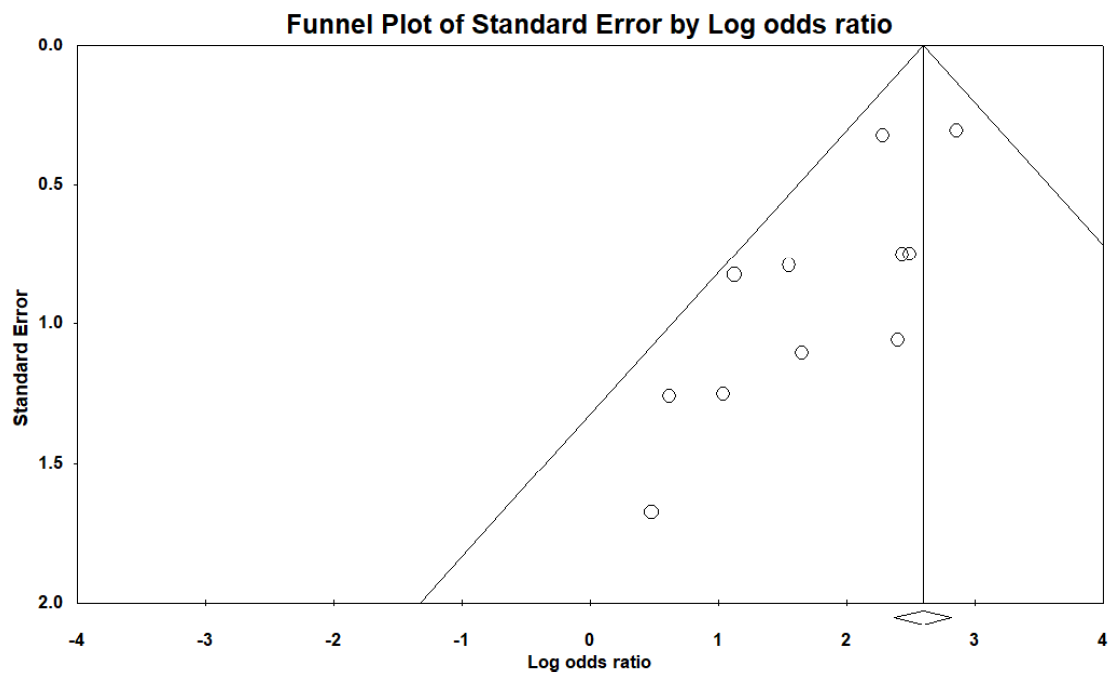

**Fig S2. Meta-analysis A. Forest plot, B. Funnel plot for the Swelling as a side effect of different COVID 19 vaccine in phase 1/2/3 RCT.**

A

## Meta Analysis

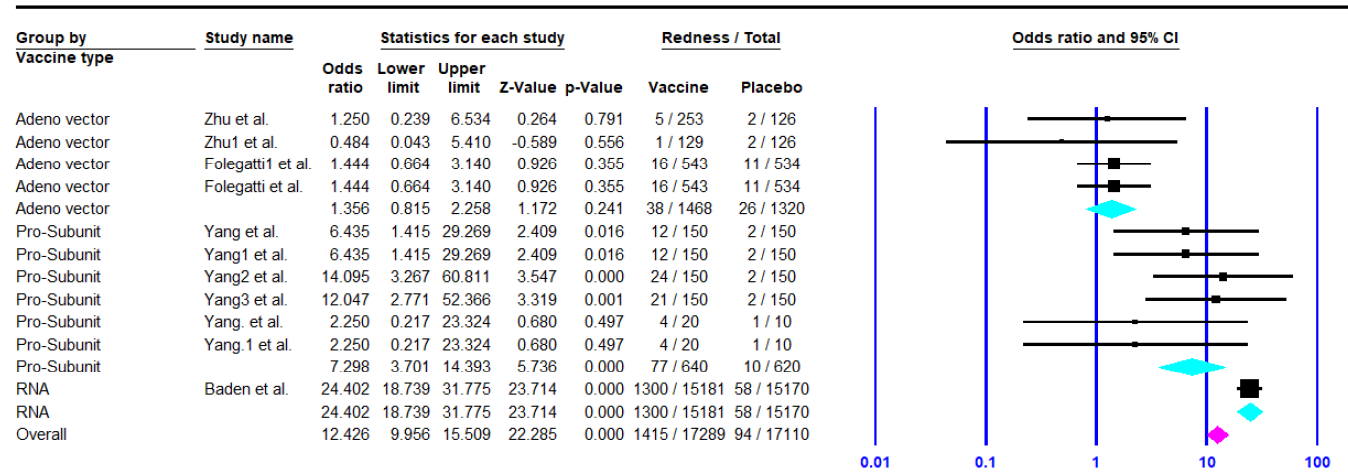

| Groups                 |                | Effect size and 95% interval |             |             | Test of null (2-Tail) |         | Heterogeneity |        |         |           |
|------------------------|----------------|------------------------------|-------------|-------------|-----------------------|---------|---------------|--------|---------|-----------|
| Group                  | Number Studies | Point estimate               | Lower limit | Upper limit | Z-value               | P-value | Q-value       | df (Q) | P-value | I-squared |
| Mixed effects analysis |                |                              |             |             |                       |         |               |        |         |           |
| Adeno vector           | 4              | 1.356                        | 0.815       | 2.258       | 1.172                 | 0.241   | 0.758         | 3      | 0.859   | 0.000     |
| Pro-Subunit            | 6              | 7.298                        | 3.701       | 14.393      | 5.736                 | 0.000   | 3.224         | 5      | 0.666   | 0.000     |
| RNA                    | 1              | 24.402                       | 18.739      | 31.775      | 23.714                | 0.000   | 0.000         | 0      | 1.000   | 0.000     |

B

## Funnel Plot of Standard Error by Log odds ratio

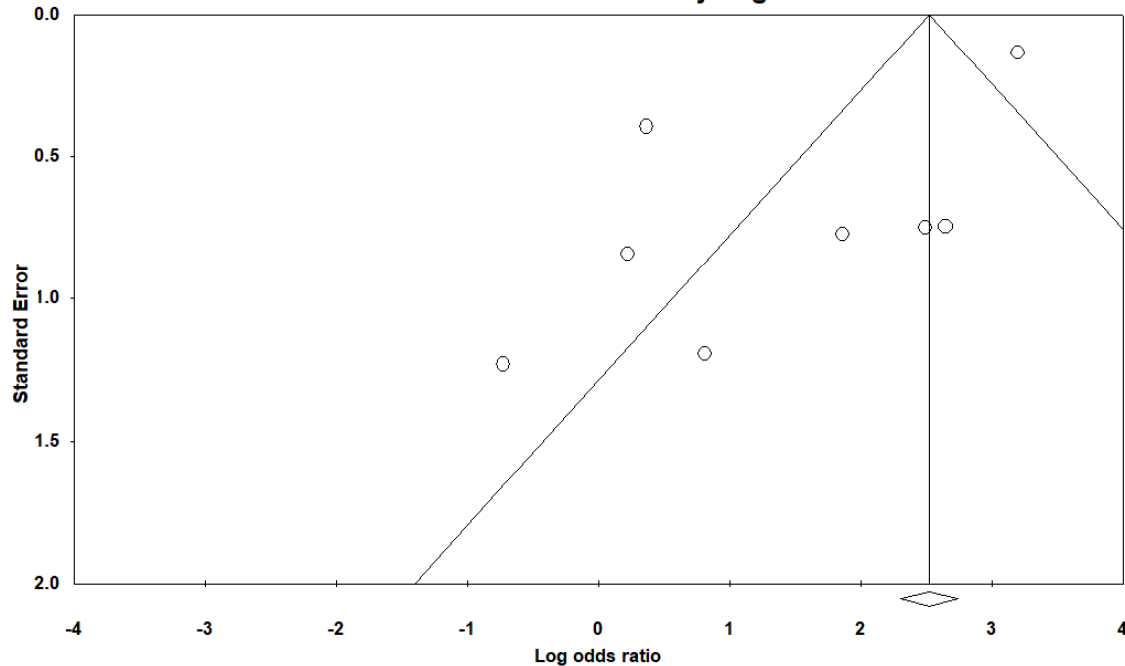

Fig S3. Meta-analysis A. Forest plot, B. Funnel plot for the Redness as a side effect of different COVID 19 vaccine in phase 1/2/3 RCT.

A

## Meta Analysis

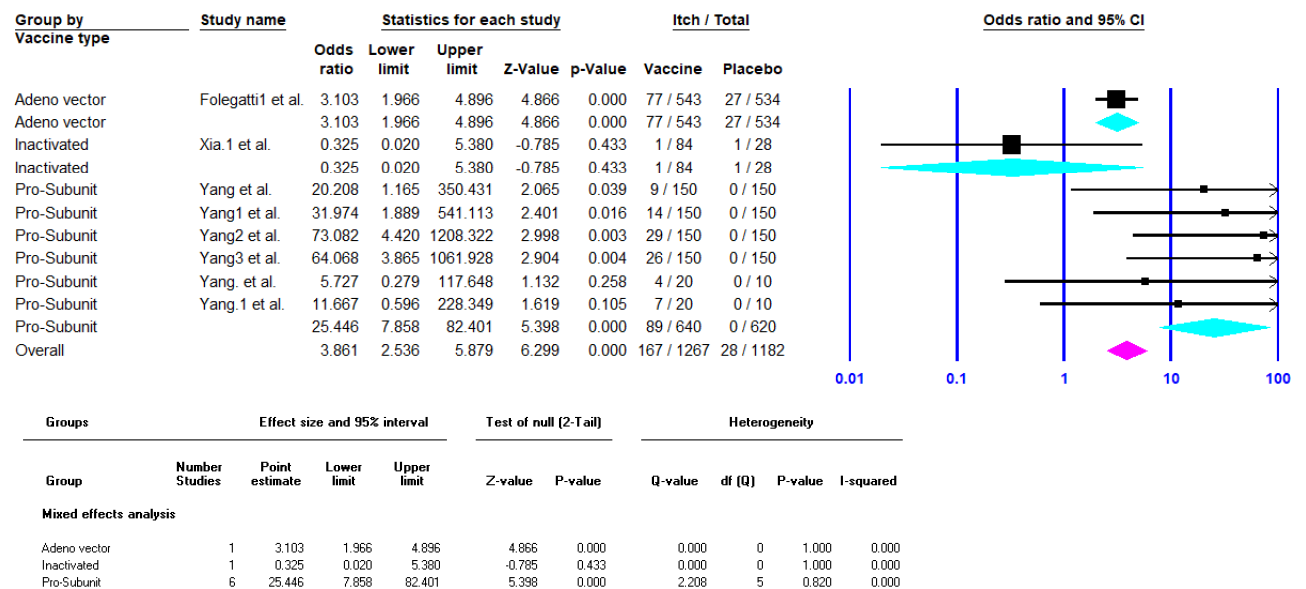

B

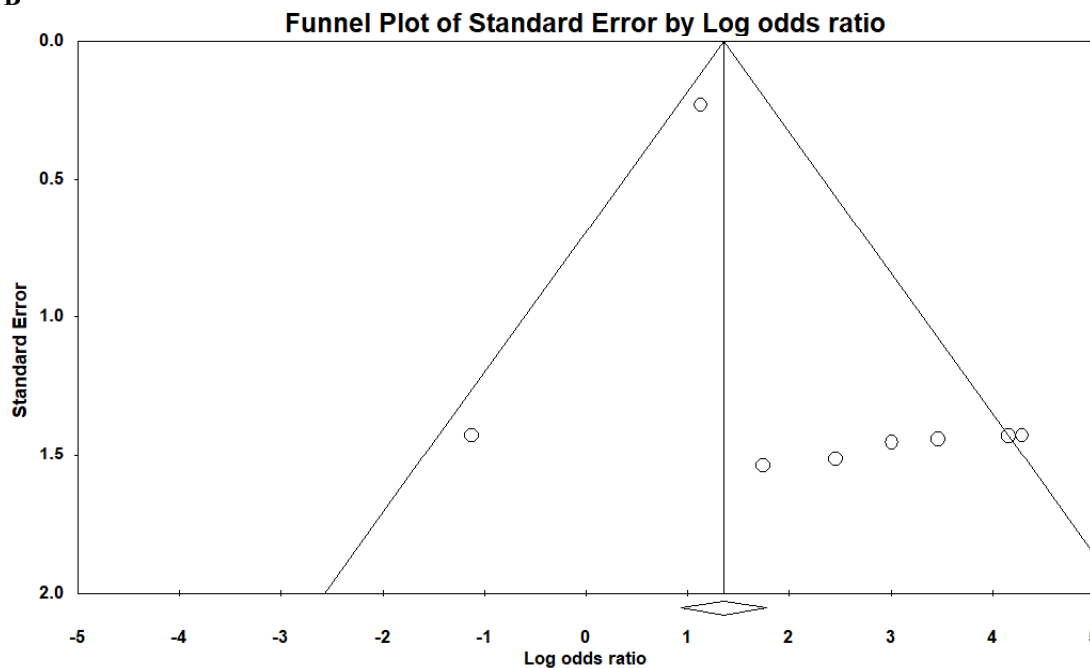

**Fig S4. Meta-analysis A. Forest plot, B. Funnel plot for the Itch as a side effect of different COVID 19 vaccine in phase 1/2 RCT.**

A

## Meta Analysis

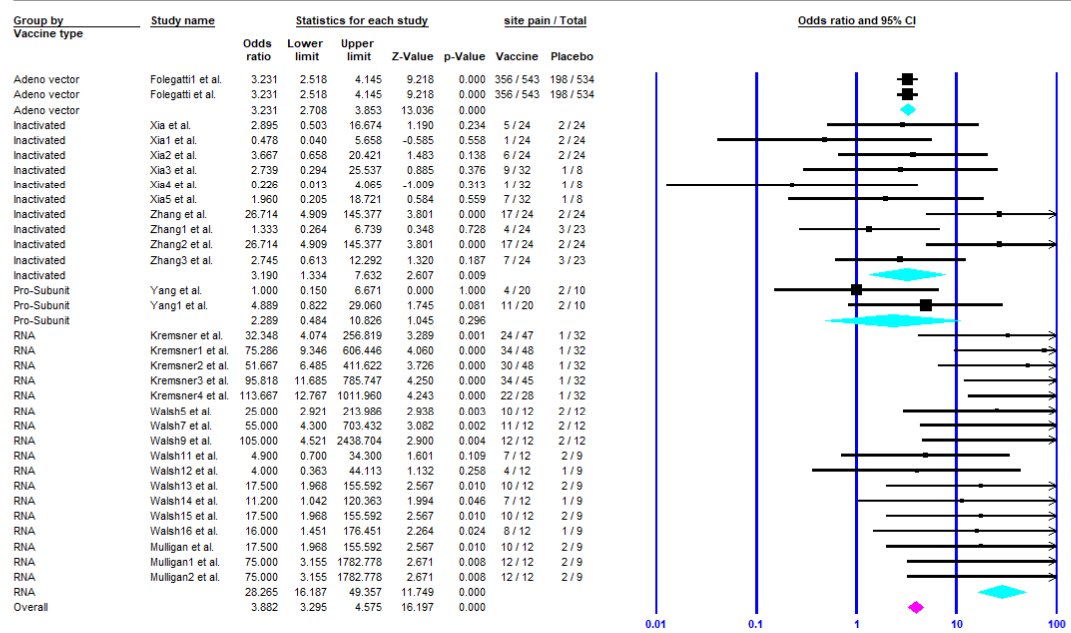

| Groups                        |                | Effect size and 95% interval |             |             | Test of null (2-Tail) |         | Heterogeneity |        |         |           |
|-------------------------------|----------------|------------------------------|-------------|-------------|-----------------------|---------|---------------|--------|---------|-----------|
| Group                         | Number Studies | Point estimate               | Lower limit | Upper limit | Z-value               | P-value | Q-value       | df (Q) | P-value | I-squared |
| <b>Mixed effects analysis</b> |                |                              |             |             |                       |         |               |        |         |           |
| Adeno vector                  | 2              | 3.231                        | 2.708       | 3.853       | 13.036                | 0.000   | 0.000         | 1      | 1.000   | 0.000     |
| Inactivated                   | 10             | 3.190                        | 1.334       | 7.632       | 2.607                 | 0.009   | 18.808        | 9      | 0.027   | 52.149    |
| Pro-Subunit                   | 2              | 2.289                        | 0.484       | 10.826      | 1.045                 | 0.296   | 1.427         | 1      | 0.232   | 29.936    |
| RNA                           | 17             | 28.265                       | 16.187      | 49.357      | 11.749                | 0.000   | 12.728        | 16     | 0.693   | 0.000     |
| Total between                 |                |                              |             |             |                       |         | 32.964        | 27     | 0.198   |           |
| Overall                       | 31             | 3.882                        | 3.295       | 4.575       | 16.197                | 0.000   | 53.556        | 30     | 0.000   | 65.326    |
|                               |                |                              |             |             |                       |         | 86.520        | 30     | 0.000   |           |

B

## Funnel Plot of Standard Error by Log odds ratio

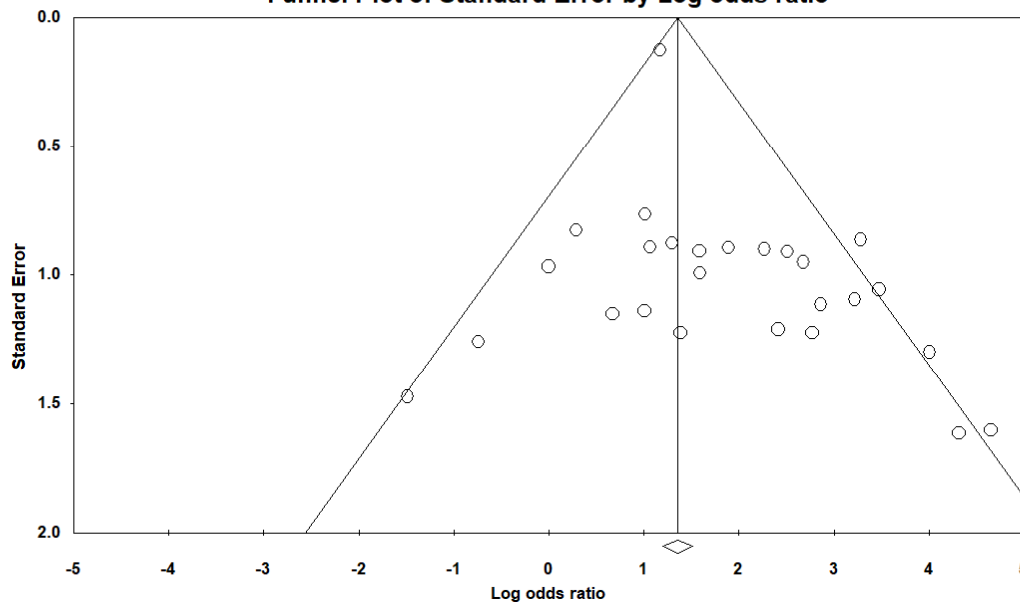

Fig S5. Meta-analysis A. Forest plot, B. Funnel plot for the injection site pain as a side effect of different COVID 19 vaccine in phase 1/2 RCT.

## Meta Analysis

| Group by<br>Vaccine type | Study name      | Statistics for each study |             |             |         |         | Cough / Total |           | Odds ratio and 95% CI |  |
|--------------------------|-----------------|---------------------------|-------------|-------------|---------|---------|---------------|-----------|-----------------------|--|
|                          |                 | Odds ratio                | Lower limit | Upper limit | Z-Value | p-Value | Vaccine       | Placebo   |                       |  |
| Adeno vector             | Zhu et al.      | 2.041                     | 0.566       | 7.369       | 1.090   | 0.276   | 12 / 253      | 3 / 126   |                       |  |
| Adeno vector             | Zhu1 et al.     | 0.646                     | 0.106       | 3.931       | -0.475  | 0.635   | 2 / 129       | 3 / 126   |                       |  |
| Adeno vector             | Logunov2 et al. | 1.828                     | 1.212       | 2.758       | 2.877   | 0.004   | 150 / 14964   | 27 / 4902 |                       |  |
| Adeno vector             |                 | 1.762                     | 1.202       | 2.583       | 2.902   | 0.004   | 164 / 15346   | 33 / 5154 |                       |  |
| Overall                  |                 | 1.762                     | 1.202       | 2.583       | 2.902   | 0.004   | 164 / 15346   | 33 / 5154 |                       |  |

  

| Groups                 | Effect size and 95% interval |                |             |             | Test of null (2-Tail) |         | Heterogeneity |        |         |           |
|------------------------|------------------------------|----------------|-------------|-------------|-----------------------|---------|---------------|--------|---------|-----------|
| Group                  | Number Studies               | Point estimate | Lower limit | Upper limit | Z-value               | P-value | Q-value       | df (Q) | P-value | I-squared |
| Mixed effects analysis |                              |                |             |             |                       |         |               |        |         |           |
| Adeno vector           | 3                            | 1.762          | 1.202       | 2.583       | 2.902                 | 0.004   | 1.268         | 2      | 0.530   | 0.000     |

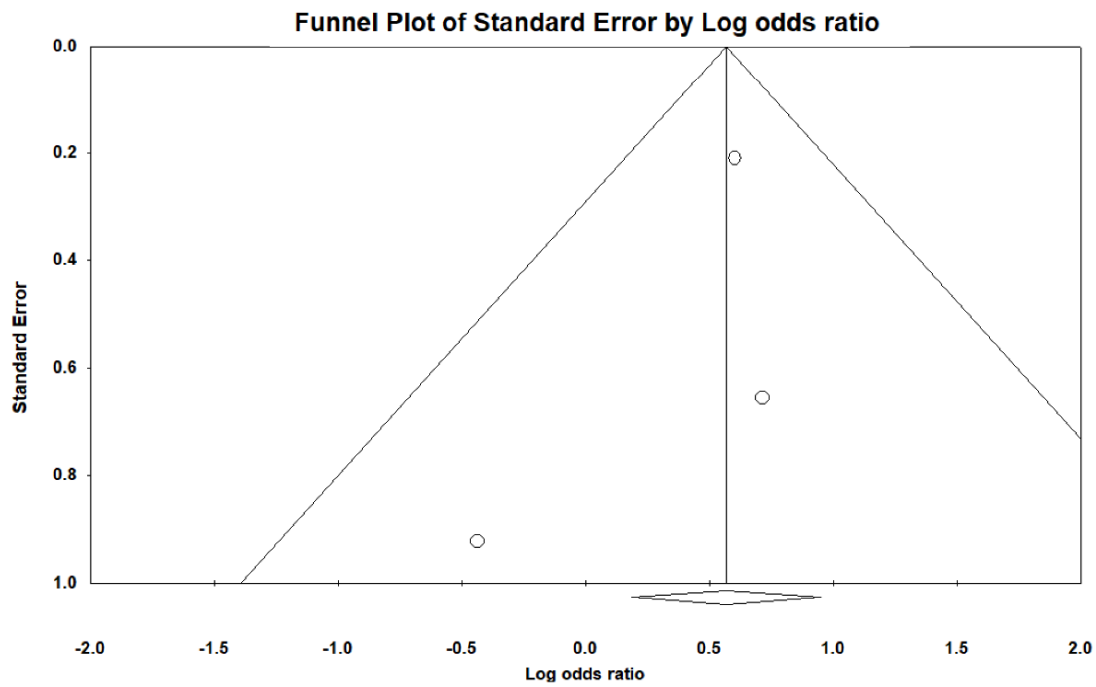

**Fig S6. Meta-analysis A. Forest plot, B. Funnel plot for the Cough as a side effect of different COVID 19 vaccine in phase 1/2/3 RCT.**

A

## Meta Analysis

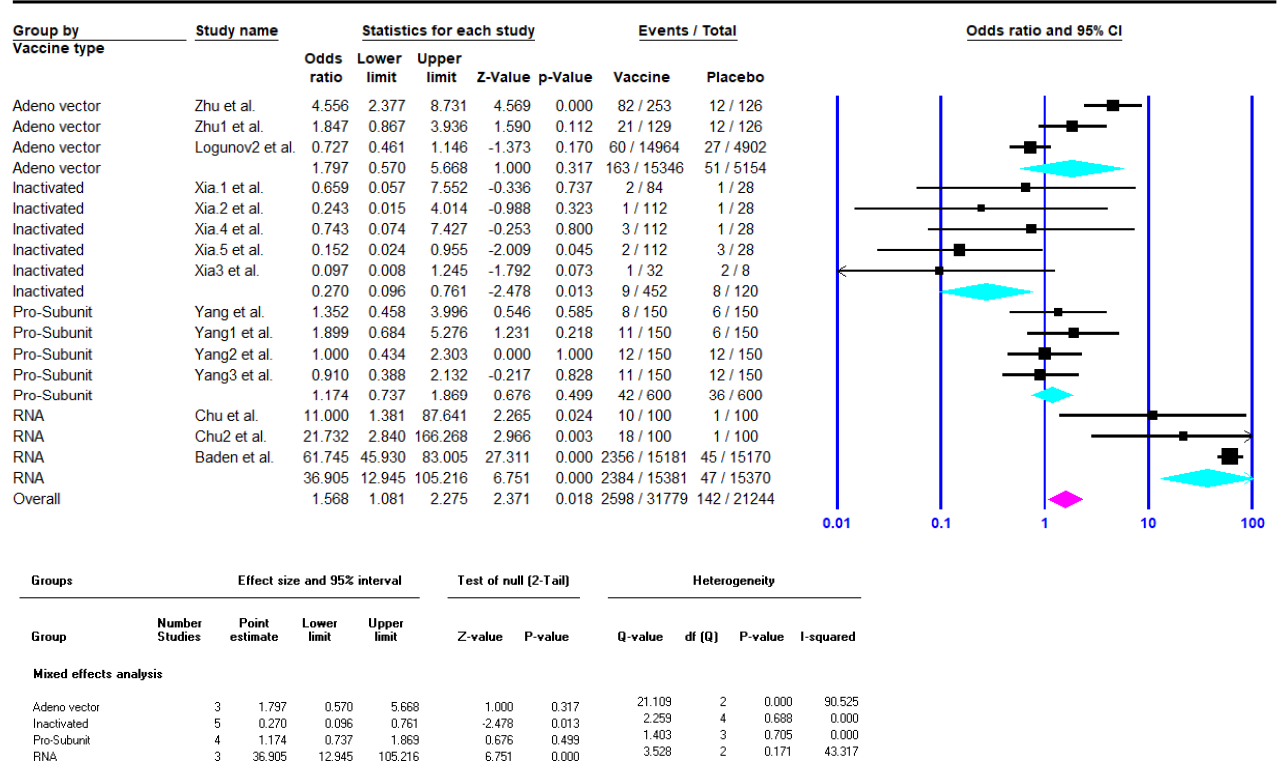

B

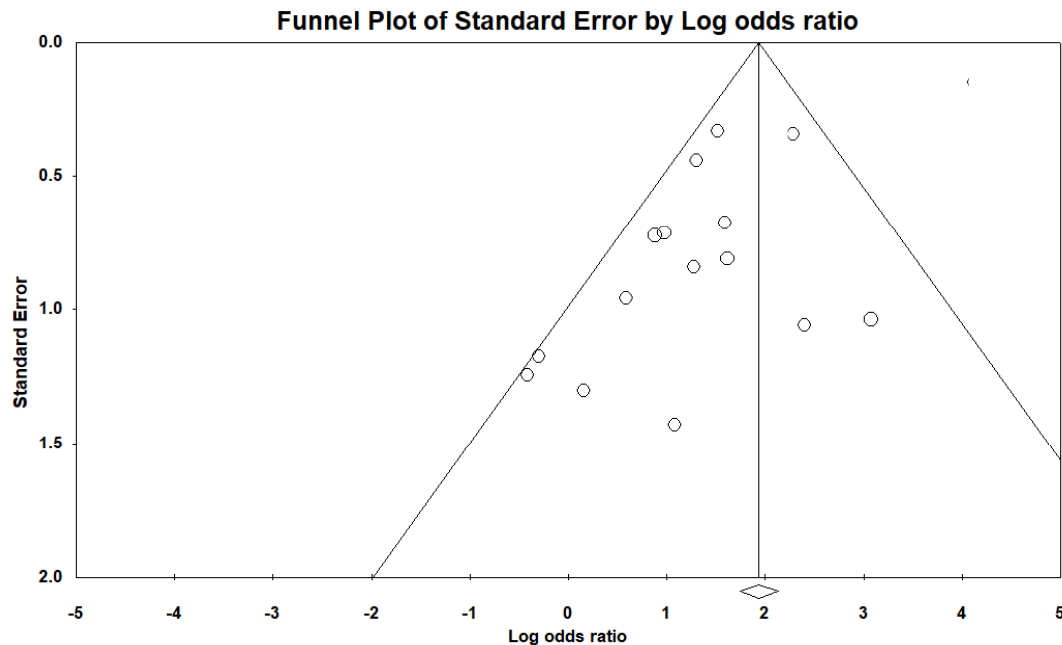

Fig S7. Meta-analysis A. Forest plot, B. Funnel plot for the Fever as a side effect of different COVID 19 vaccine in phase 1/2/3 RCT.

A

## Meta Analysis

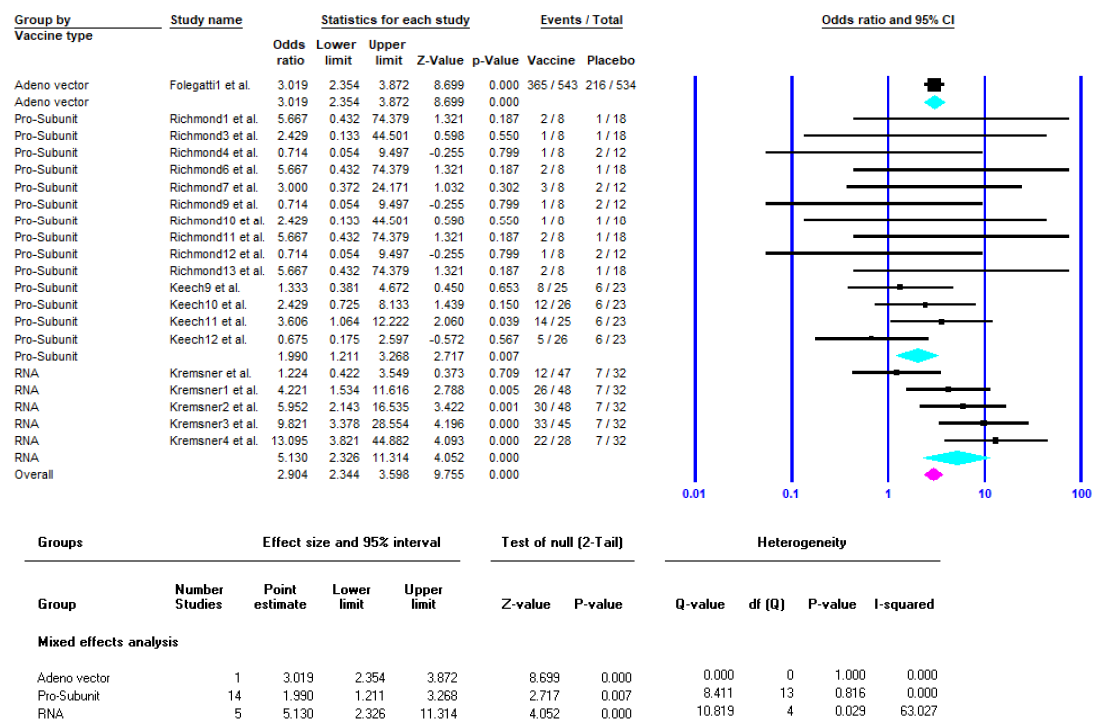

B

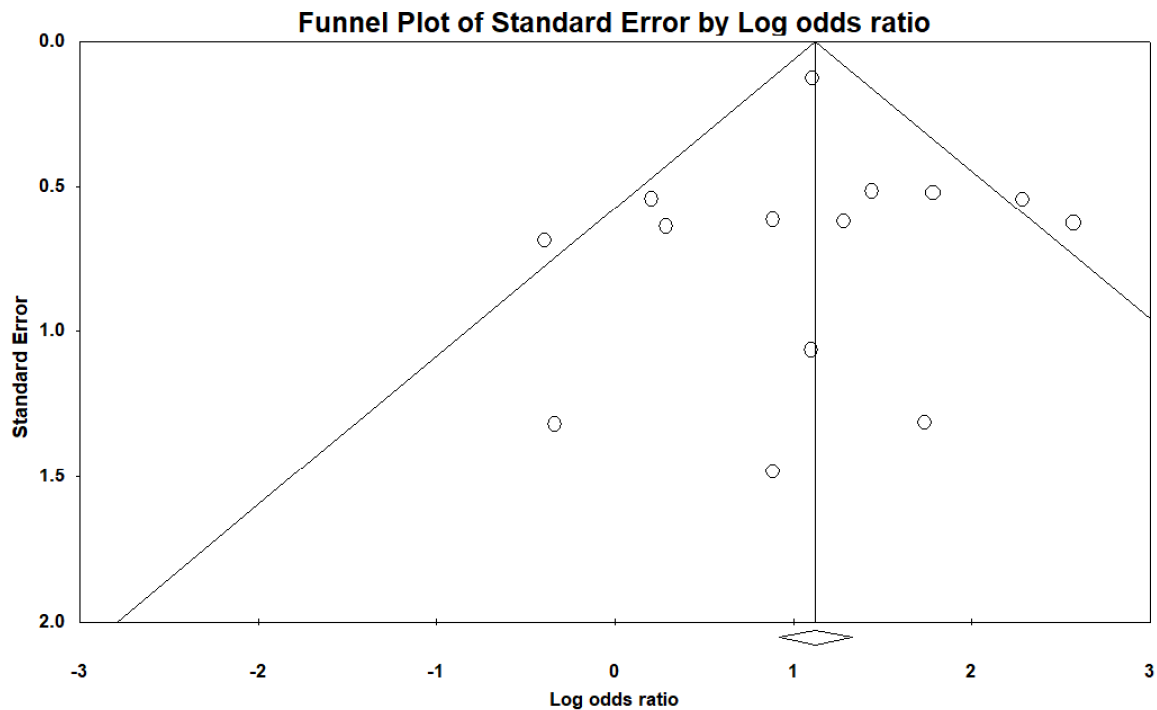

Fig S8. Meta-analysis A. Forest plot, B. Funnel plot for the Headache as a side effect of different COVID 19 vaccine in phase 1/2 RCT.

A

## Meta Analysis

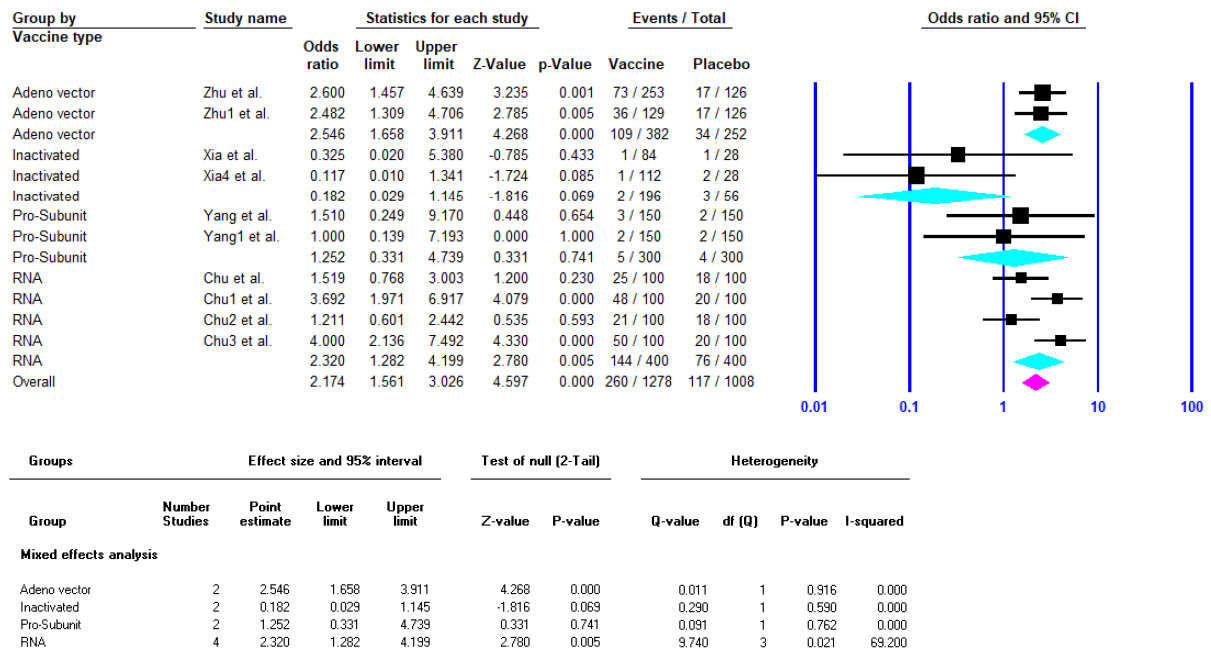

B

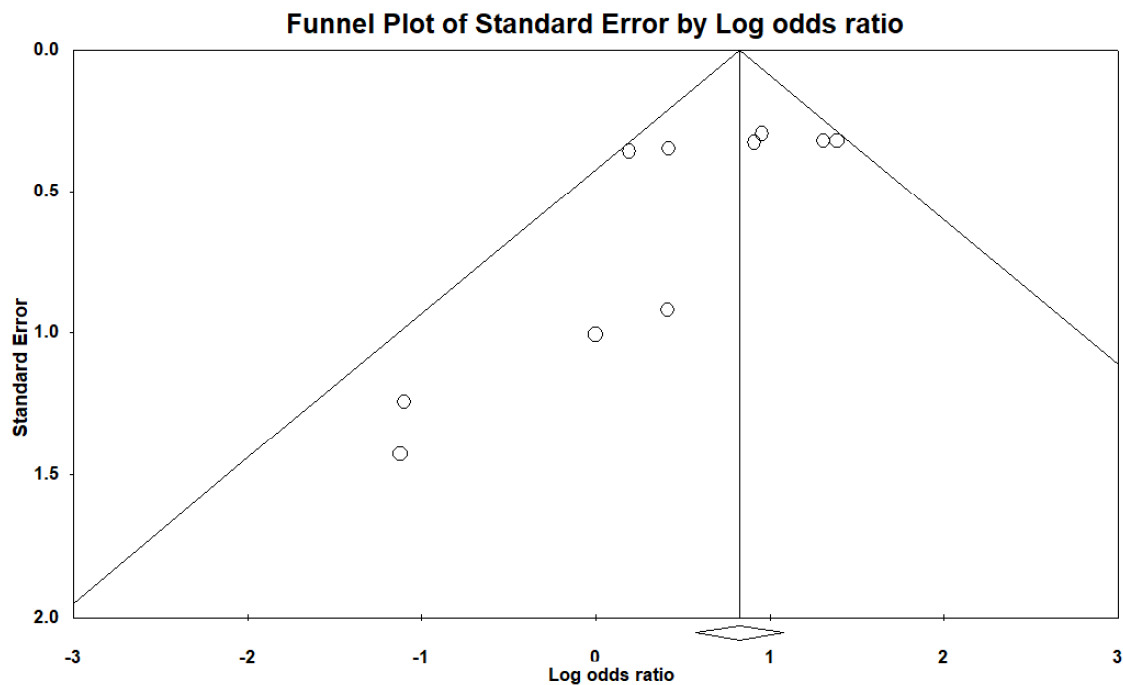

Fig S9. Meta-analysis A. Forest plot, B. Funnel plot for the Headache as a side effect of different COVID 19 vaccine in phase 2 RCT.

## Meta Analysis

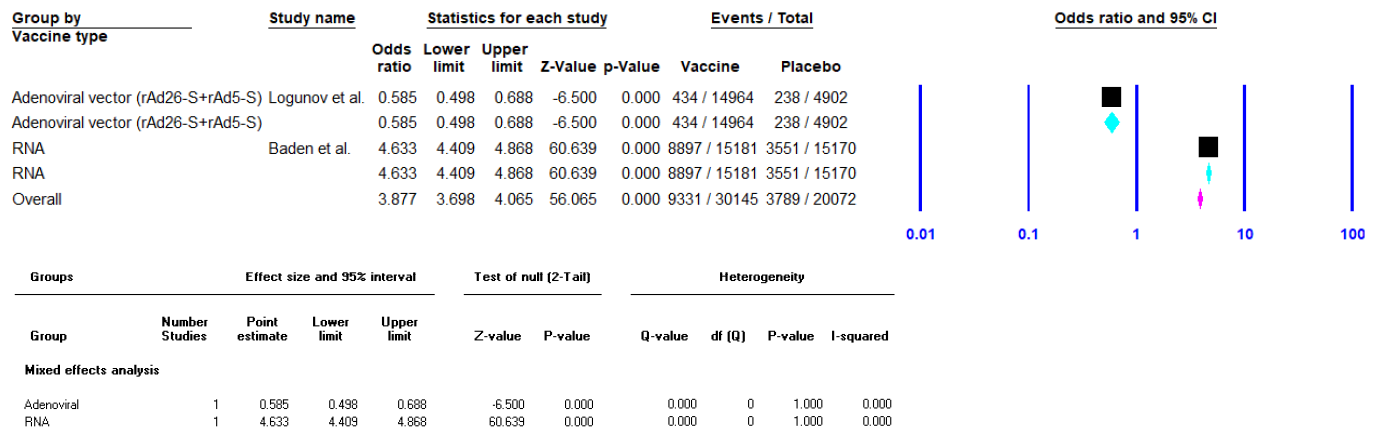

**Fig S10. Meta-analysis A. Forest plot, B. Funnel plot for the Headache as a side effect of different COVID 19 vaccine in phase 3 RCT.**

A

## Meta Analysis

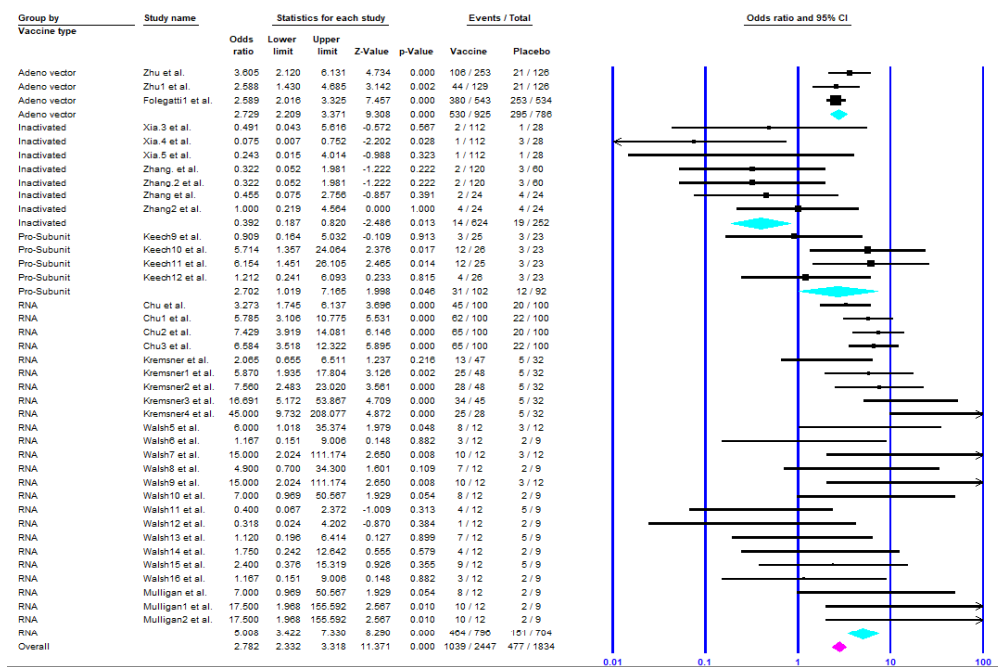

| Groups                 |                | Effect size and 95% interval |             |             | Test of null (2-Tail) |         | Heterogeneity |        |         |           |
|------------------------|----------------|------------------------------|-------------|-------------|-----------------------|---------|---------------|--------|---------|-----------|
| Group                  | Number Studies | Point estimate               | Lower limit | Upper limit | Z-value               | P-value | Q-value       | df (Q) | P-value | I-squared |
| Mixed effects analysis |                |                              |             |             |                       |         |               |        |         |           |
| Adeno vector           | 3              | 2.729                        | 2.209       | 3.371       | 9.308                 | 0.000   | 1.257         | 2      | 0.533   | 0.000     |
| Inactivated            | 7              | 0.352                        | 0.187       | 0.820       | -2.486                | 0.013   | 3.696         | 6      | 0.718   | 0.000     |
| Pro-Subunit            | 4              | 2.702                        | 1.019       | 7.165       | 1.398                 | 0.046   | 4.779         | 3      | 0.189   | 37.224    |
| RNA                    | 24             | 5.008                        | 3.422       | 7.330       | 8.280                 | 0.000   | 44.427        | 23     | 0.005   | 46.230    |

B

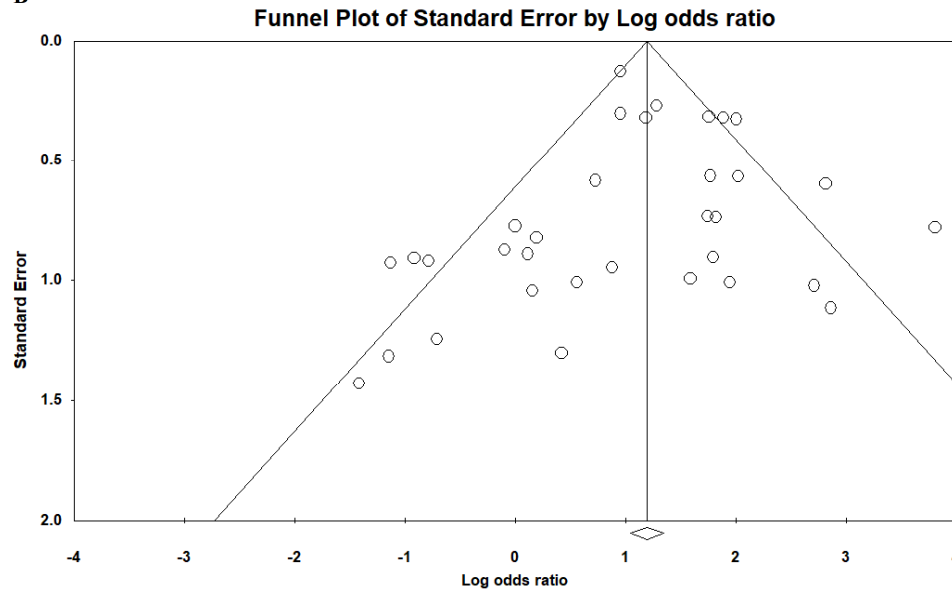

Fig S11. Meta-analysis A. Forest plot, B. Funnel plot for the Fatigue as a side effect of different COVID 19 vaccine in phase 1/2 RCT.

## Meta Analysis

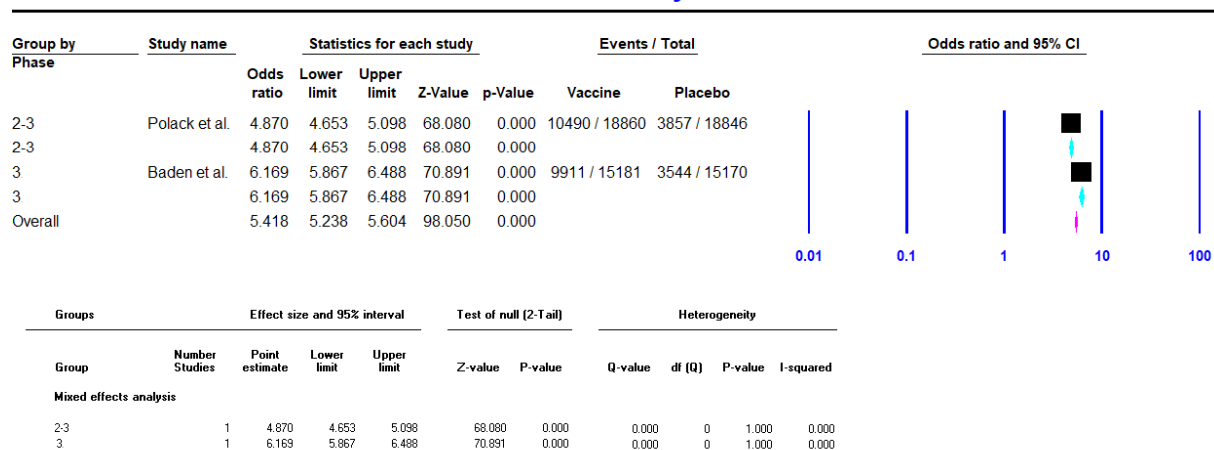

**Fig S12. Meta-analysis A. Forest plot, B. Funnel plot for the Fatigue as a side effect of different COVID 19 vaccine in both mRNA-based vaccine, in RCT 2/3, and 3.**

A

## Meta Analysis

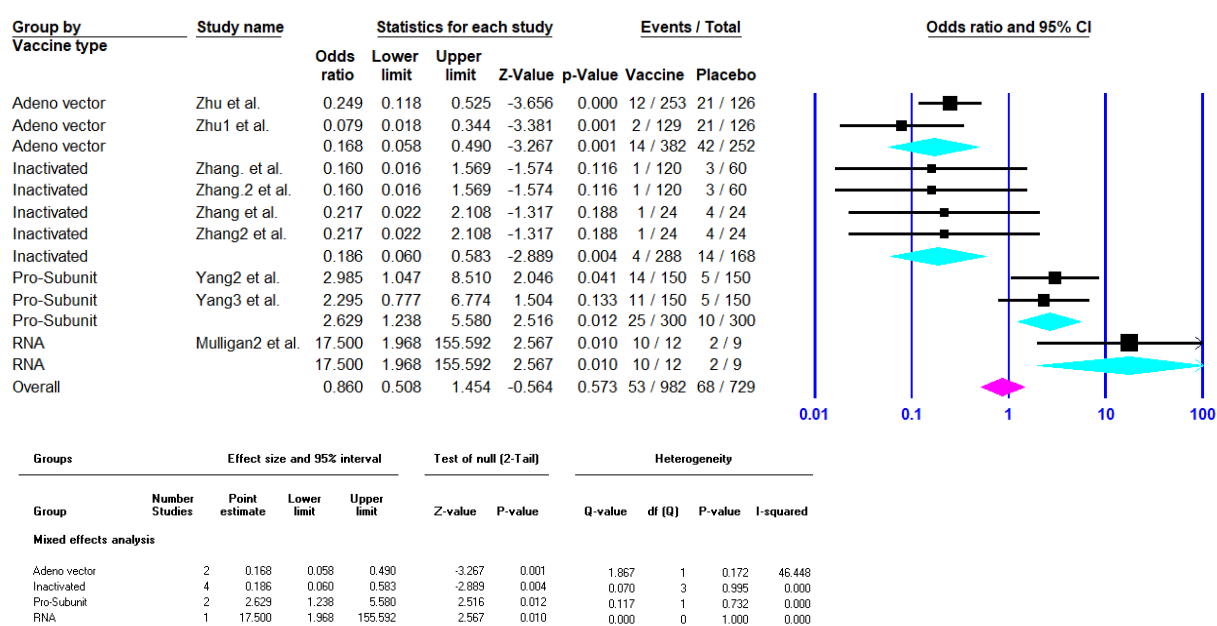

B

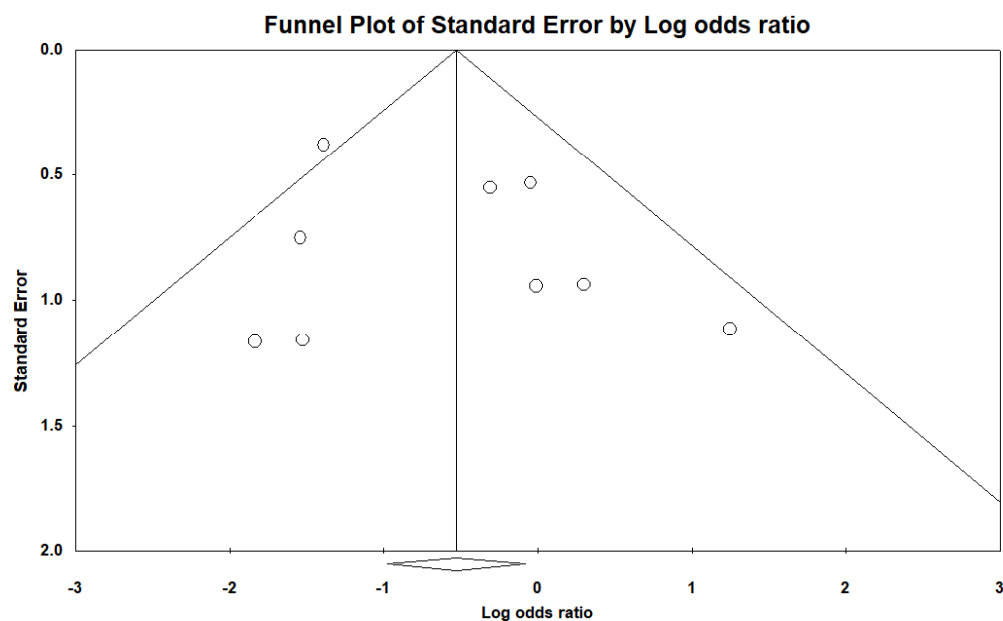

Fig S13. Meta-analysis A. Forest plot, B. Funnel plot for the Induration as a side effect of different COVID 19 vaccine in RCT 1/2.

A

## Meta Analysis

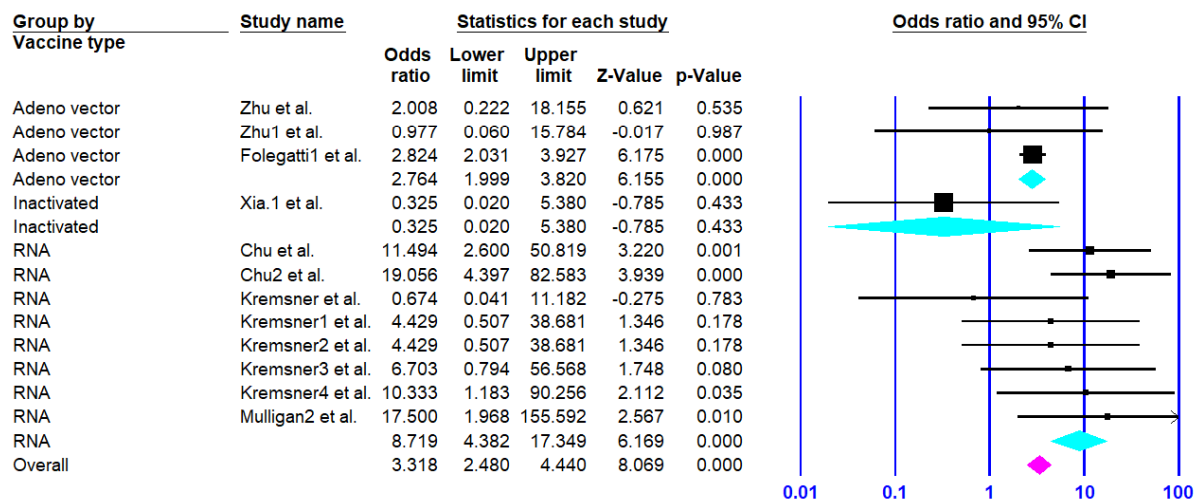

| Groups                        |                   | Effect size and 95% interval |                |                | Test of null (2-Tail) |         | Heterogeneity |        |         |           |
|-------------------------------|-------------------|------------------------------|----------------|----------------|-----------------------|---------|---------------|--------|---------|-----------|
| Group                         | Number<br>Studies | Point<br>estimate            | Lower<br>limit | Upper<br>limit | Z-value               | P-value | Q-value       | df (Q) | P-value | I-squared |
| <b>Mixed effects analysis</b> |                   |                              |                |                |                       |         |               |        |         |           |
| Adeno vector                  | 3                 | 2.764                        | 1.999          | 3.820          | 6.155                 | 0.000   | 0.634         | 2      | 0.728   | 0.000     |
| Inactivated                   | 1                 | 0.325                        | 0.020          | 5.380          | -0.785                | 0.433   | 0.000         | 0      | 1.000   | 0.000     |
| RNA                           | 8                 | 8.719                        | 4.382          | 17.349         | 6.169                 | 0.000   | 5.639         | 7      | 0.582   | 0.000     |

B

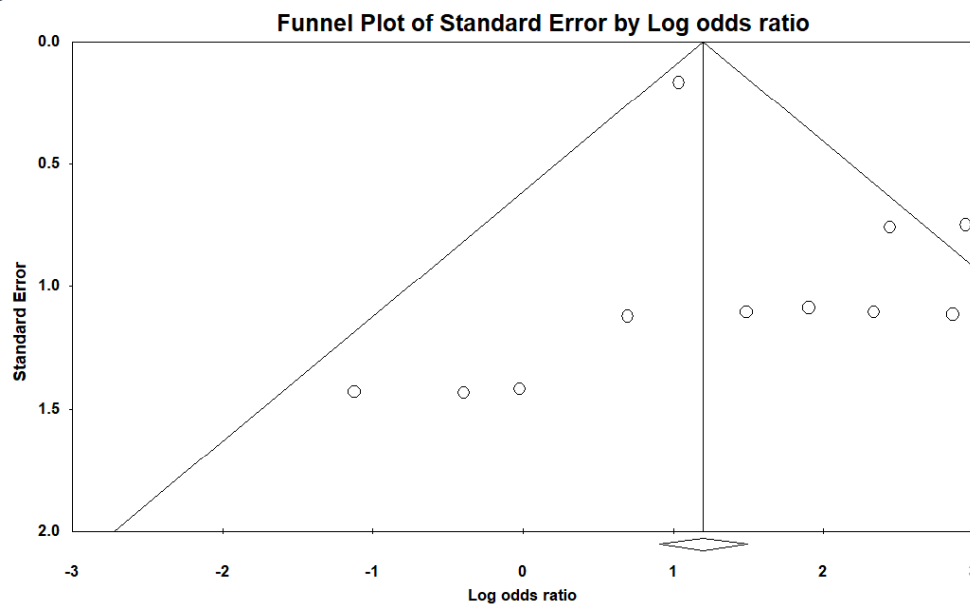

Fig S14. Meta-analysis A. Forest plot, B. Funnel plot for the Vomiting as a side effect of different COVID 19 vaccine in RCT 1/2.

## Meta Analysis

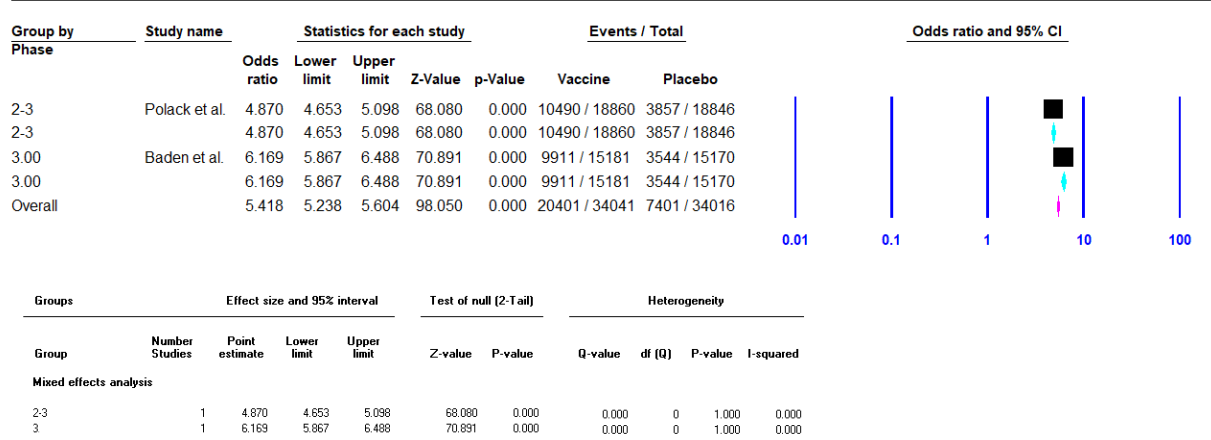

**Fig S15. Meta-analysis A. Forest plot, B. Funnel plot for the Vomiting as a side effect of different COVID 19 vaccine in both mRNA-based vaccine, in RCT 2/3, and 3.**

A

## Meta Analysis

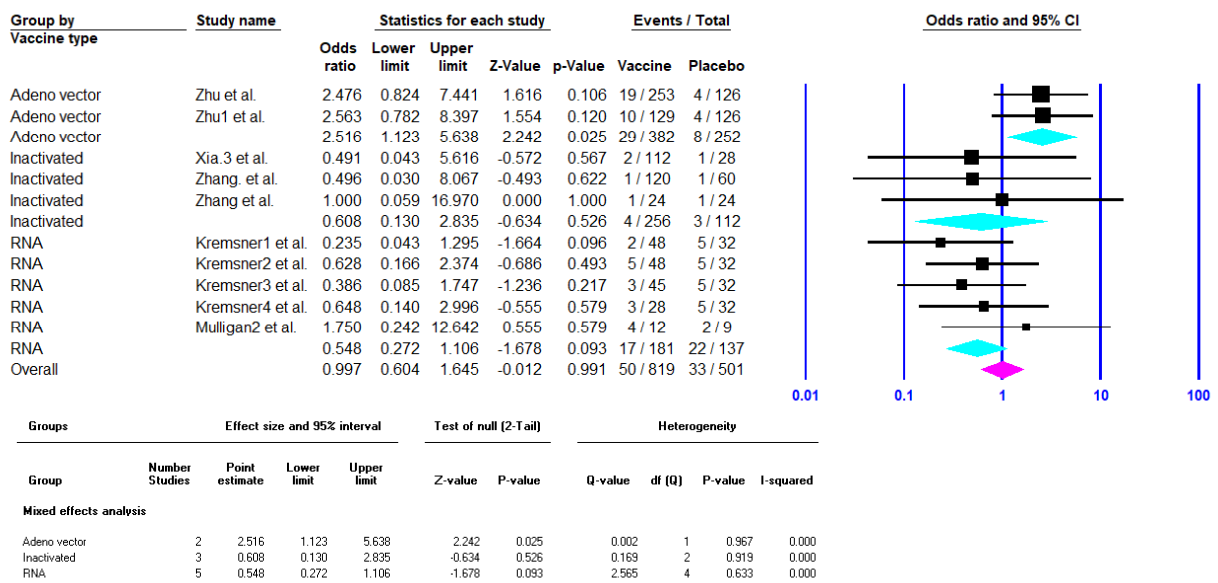

B

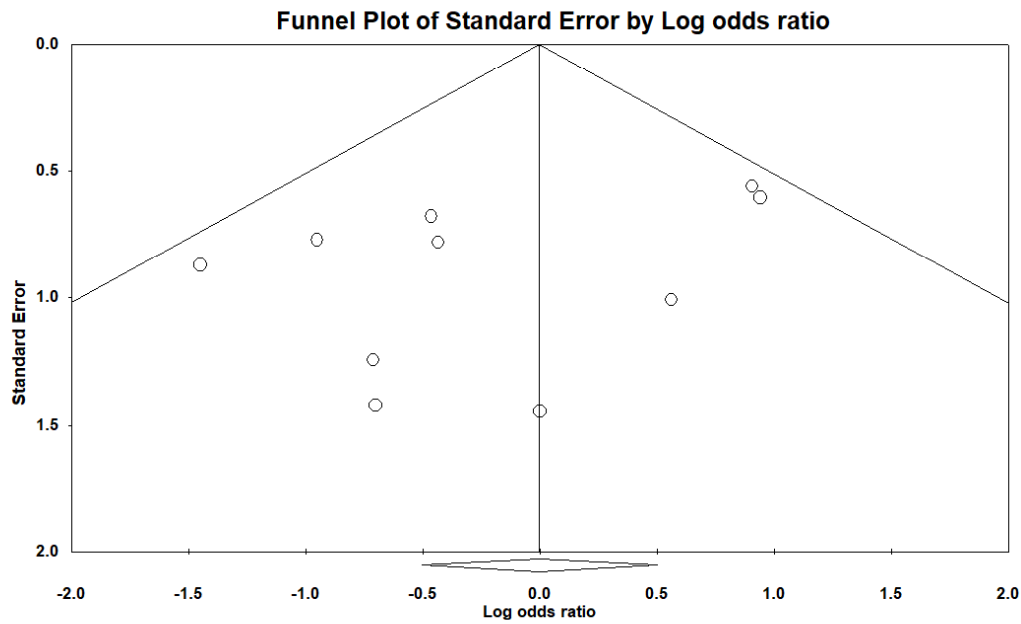

**Fig S16. Meta-analysis A. Forest plot, B. Funnel plot for the Diarrhea as a side effect of different COVID 19 vaccine in RCT 1/2.**

A

## Meta Analysis

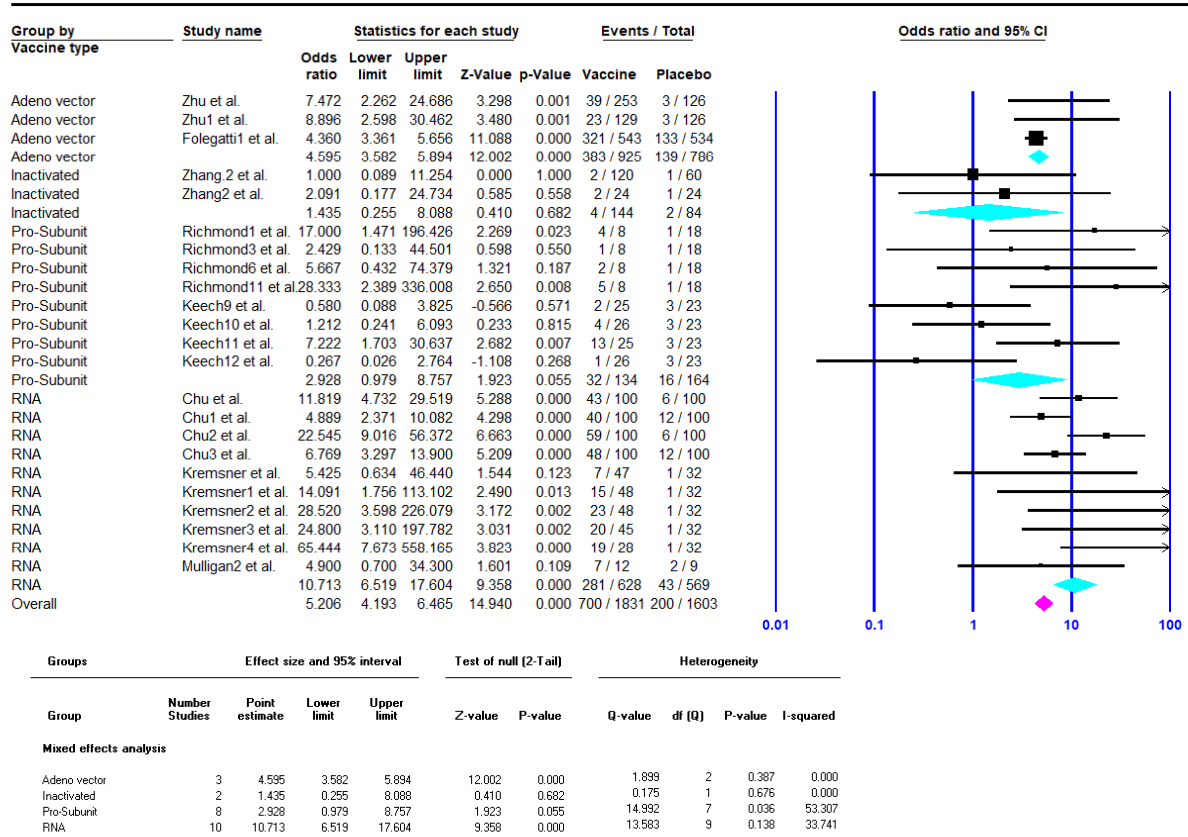

B

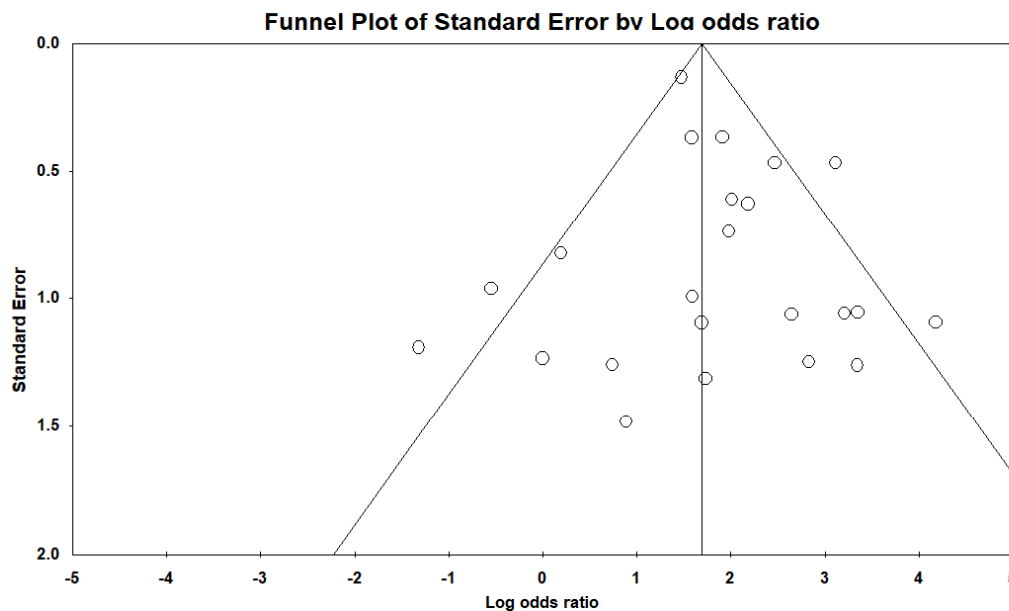

Fig S17. Meta-analysis A. Forest plot, B. Funnel plot for the Myalgia as a side effect of different COVID 19 vaccine in RCT 1/2.

## Meta Analysis

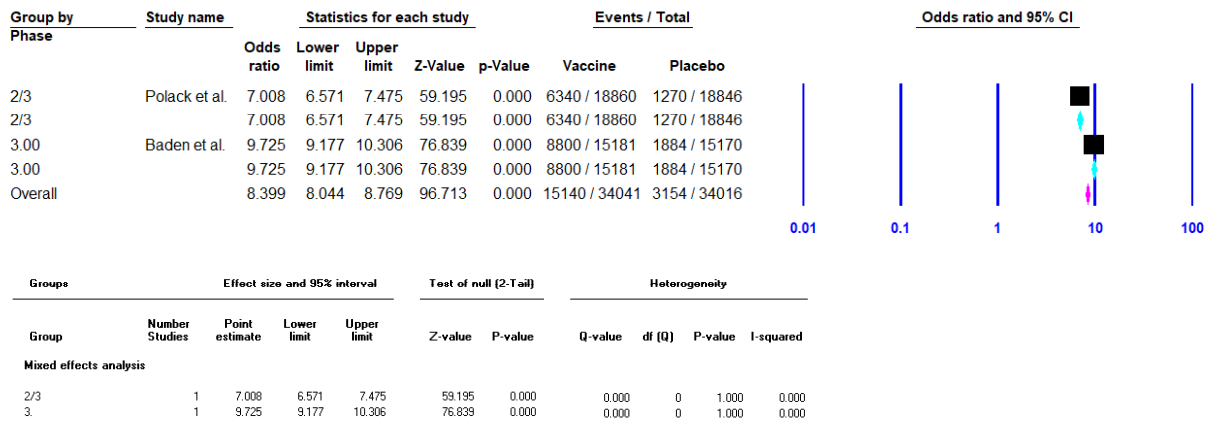

**Fig S18. Meta-analysis A. Forest plot, B. Funnel plot for the Myalgia as a side effect of different COVID 19 vaccine in RCT 3.**

## Meta Analysis

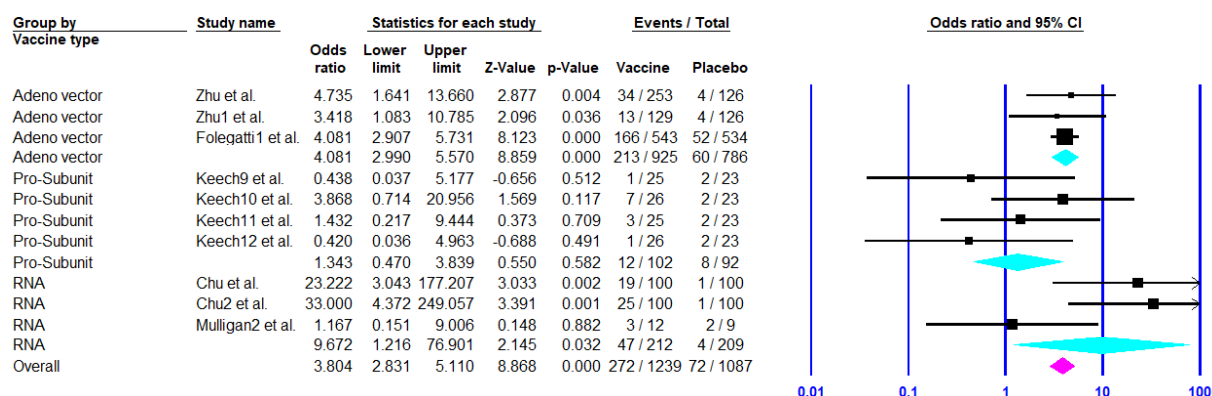

| Groups                        |                | Effect size and 95% interval |             |             | Test of null (2-Tail) |         | Heterogeneity |        |         |           |
|-------------------------------|----------------|------------------------------|-------------|-------------|-----------------------|---------|---------------|--------|---------|-----------|
| Group                         | Number Studies | Point estimate               | Lower limit | Upper limit | Z-value               | P-value | Q-value       | df (Q) | P-value | I-squared |
| <b>Mixed effects analysis</b> |                |                              |             |             |                       |         |               |        |         |           |
| Adeno vector                  | 3              | 4.081                        | 2.990       | 5.570       | 8.959                 | 0.000   | 0.167         | 2      | 0.920   | 0.000     |
| Pro-Subunit                   | 4              | 1.343                        | 0.470       | 3.839       | 0.550                 | 0.582   | 3.152         | 3      | 0.369   | 4.833     |
| RNA                           | 3              | 9.672                        | 1.216       | 76.901      | 2.145                 | 0.032   | 6.244         | 2      | 0.044   | 67.970    |

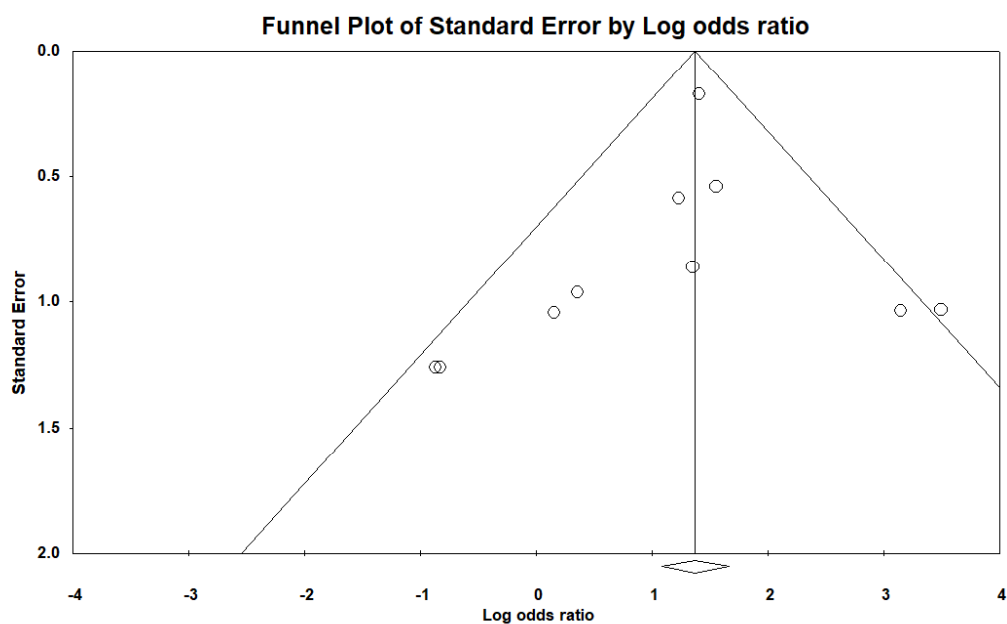

Fig S19. Meta-analysis A. Forest plot, B. Funnel plot for the Arthralgia as a side effect of different COVID 19 vaccine in RCT 2/3.

A

## Meta Analysis

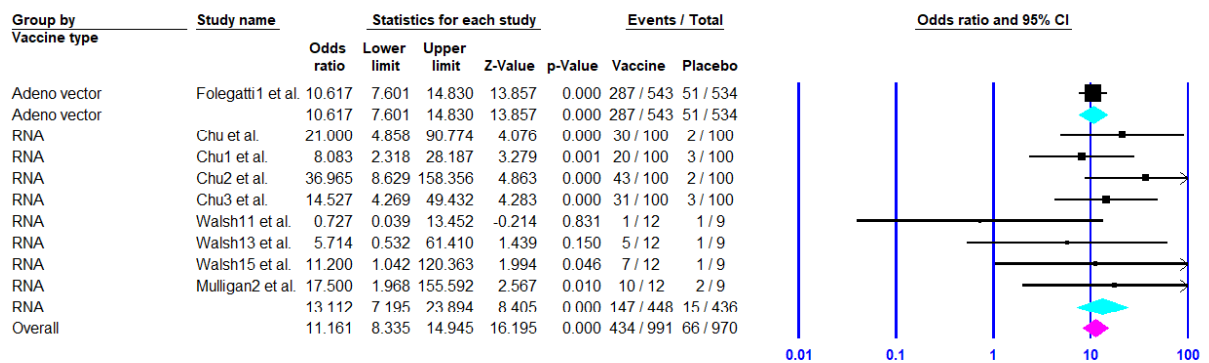

| Groups                        |                   | Effect size and 95% interval |                |                | Test of null (2-Tail) |         | Heterogeneity |        |         |           |
|-------------------------------|-------------------|------------------------------|----------------|----------------|-----------------------|---------|---------------|--------|---------|-----------|
| Group                         | Number<br>Studies | Point<br>estimate            | Lower<br>limit | Upper<br>limit | Z-value               | P-value | Q-value       | df (Q) | P-value | I-squared |
| <b>Mixed effects analysis</b> |                   |                              |                |                |                       |         |               |        |         |           |
| Adeno vector                  | 1                 | 10.617                       | 7.601          | 14.830         | 13.857                | 0.000   | 0.000         | 0      | 1.000   | 0.000     |
| RNA                           | 8                 | 13.112                       | 7.195          | 23.894         | 8.405                 | 0.000   | 7.278         | 7      | 0.400   | 3.823     |

B

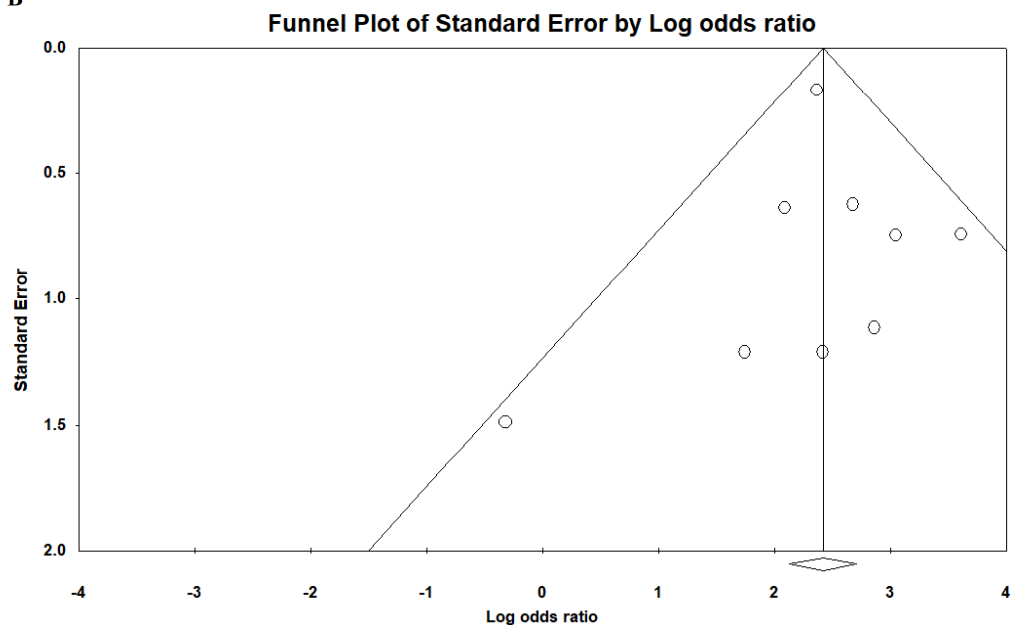

Fig S20. Meta-analysis A. Forest plot, B. Funnel plot for the Chills as a side effect of different COVID 19 vaccine in RCT 2/3.

## Meta Analysis

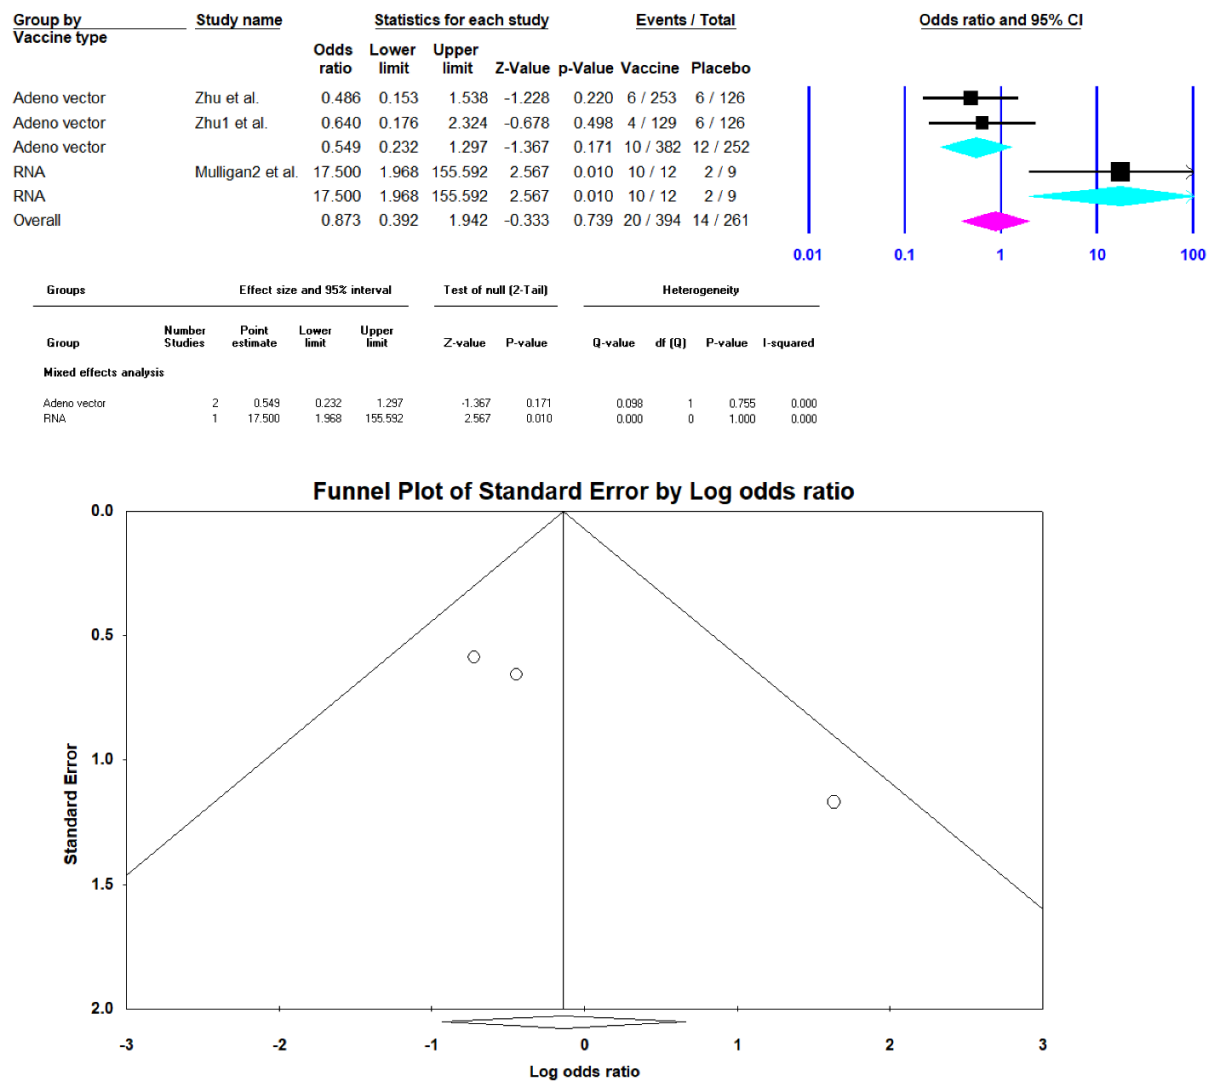

**Fig S21. Meta-analysis A. Forest plot, B. Funnel plot for the Pruritus as a side effect of different COVID 19 vaccine in RCT 2/3.**

## Meta Analysis

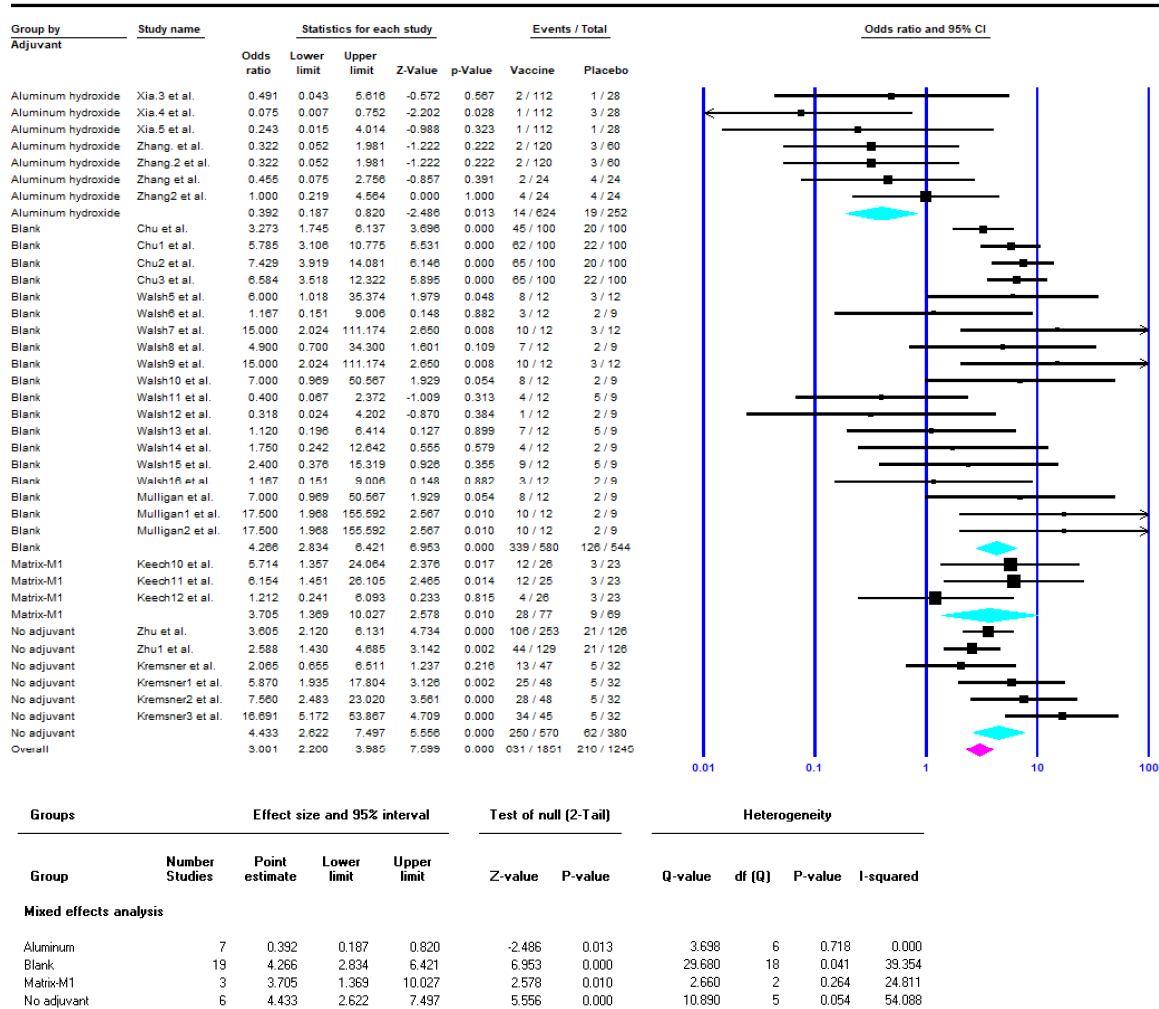

**Fig S22. Meta-analysis A. Forest plot, B. Funnel plot for the Fatigue as a side effect based on the adjuvant type in phase 2/3 RCT.**

## Meta Analysis

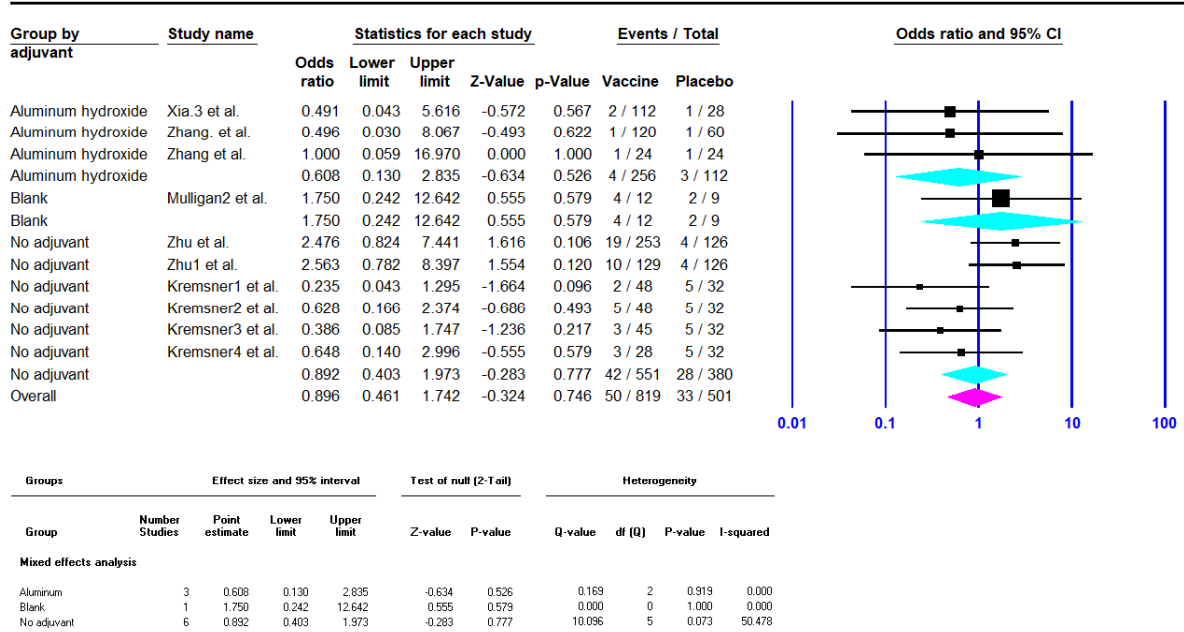

**Fig S23. Meta-analysis A. Forest plot, B. Funnel plot for the Diarrhea as a side effect based on the adjuvant type in phase 2/3 RCT**

# Meta Analysis

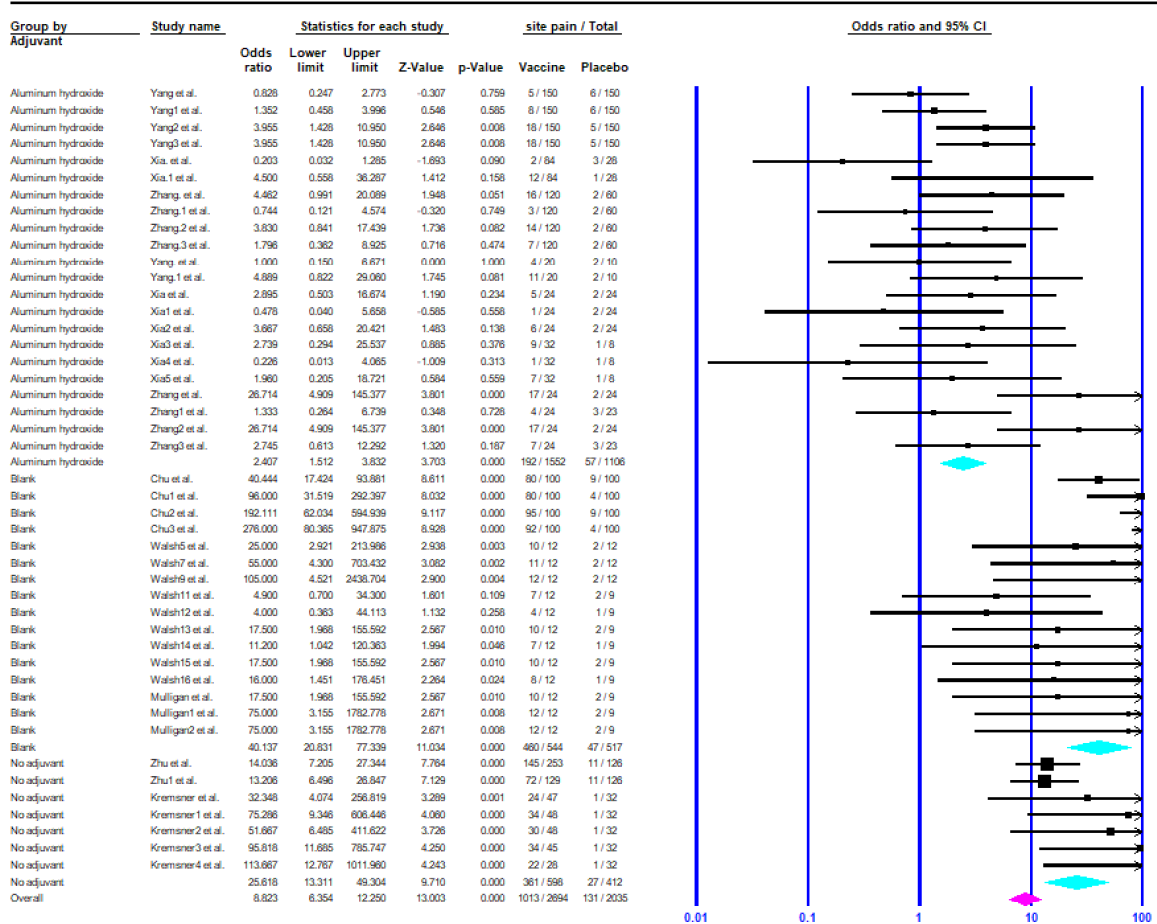

| Groups                 |                | Effect size and 95% interval |             |             | Test of null (2-Tail) |         | Heterogeneity |        |         |           |
|------------------------|----------------|------------------------------|-------------|-------------|-----------------------|---------|---------------|--------|---------|-----------|
| Group                  | Number Studies | Point estimate               | Lower limit | Upper limit | Z-value               | P-value | Q-value       | df (Q) | P-value | I-squared |
| Mixed effects analysis |                |                              |             |             |                       |         |               |        |         |           |
| Aluminum               | 22             | 2.407                        | 1.512       | 3.832       | 3.703                 | 0.000   | 37.872        | 21     | 0.013   | 44.551    |
| Blank                  | 16             | 40.137                       | 20.831      | 77.339      | 11.034                | 0.000   | 29.855        | 15     | 0.012   | 49.757    |
| No adjuvant            | 7              | 25.618                       | 13.311      | 49.304      | 9.710                 | 0.000   | 9.464         | 6      | 0.149   | 36.601    |

Fig S24. Meta-analysis A. Forest plot, B. Funnel plot for the Injection site pain as a side effect based on the adjuvant type in phase 2/3 RCT

## Meta Analysis

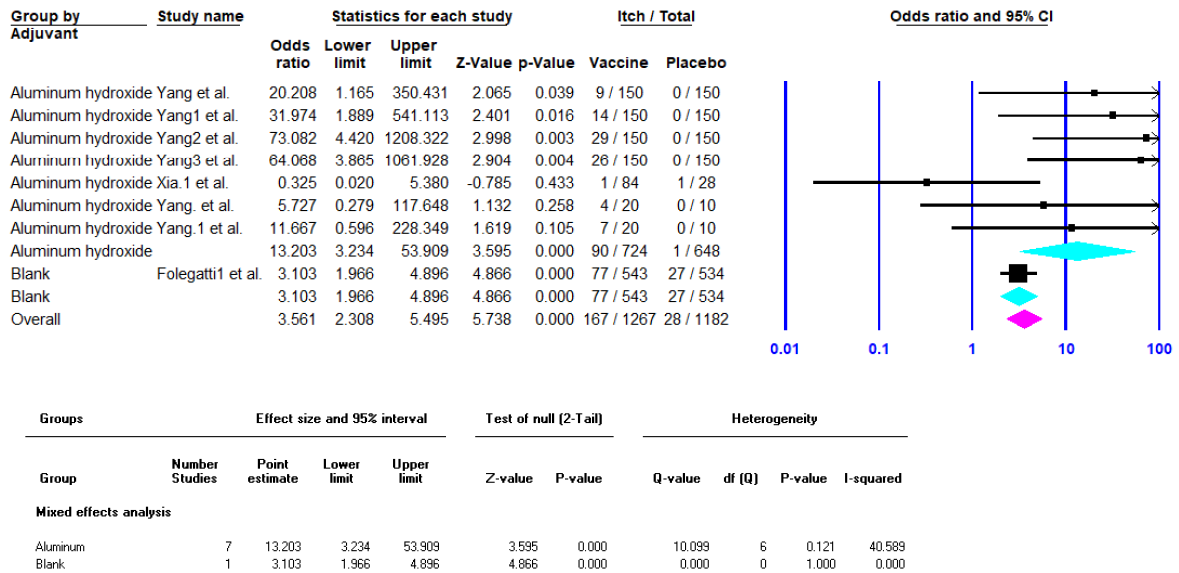

**Fig S25. Meta-analysis A. Forest plot, B. Funnel plot for the Itch as a side effect based on the adjuvant type in phase 2/3 RCT**

# Meta Analysis

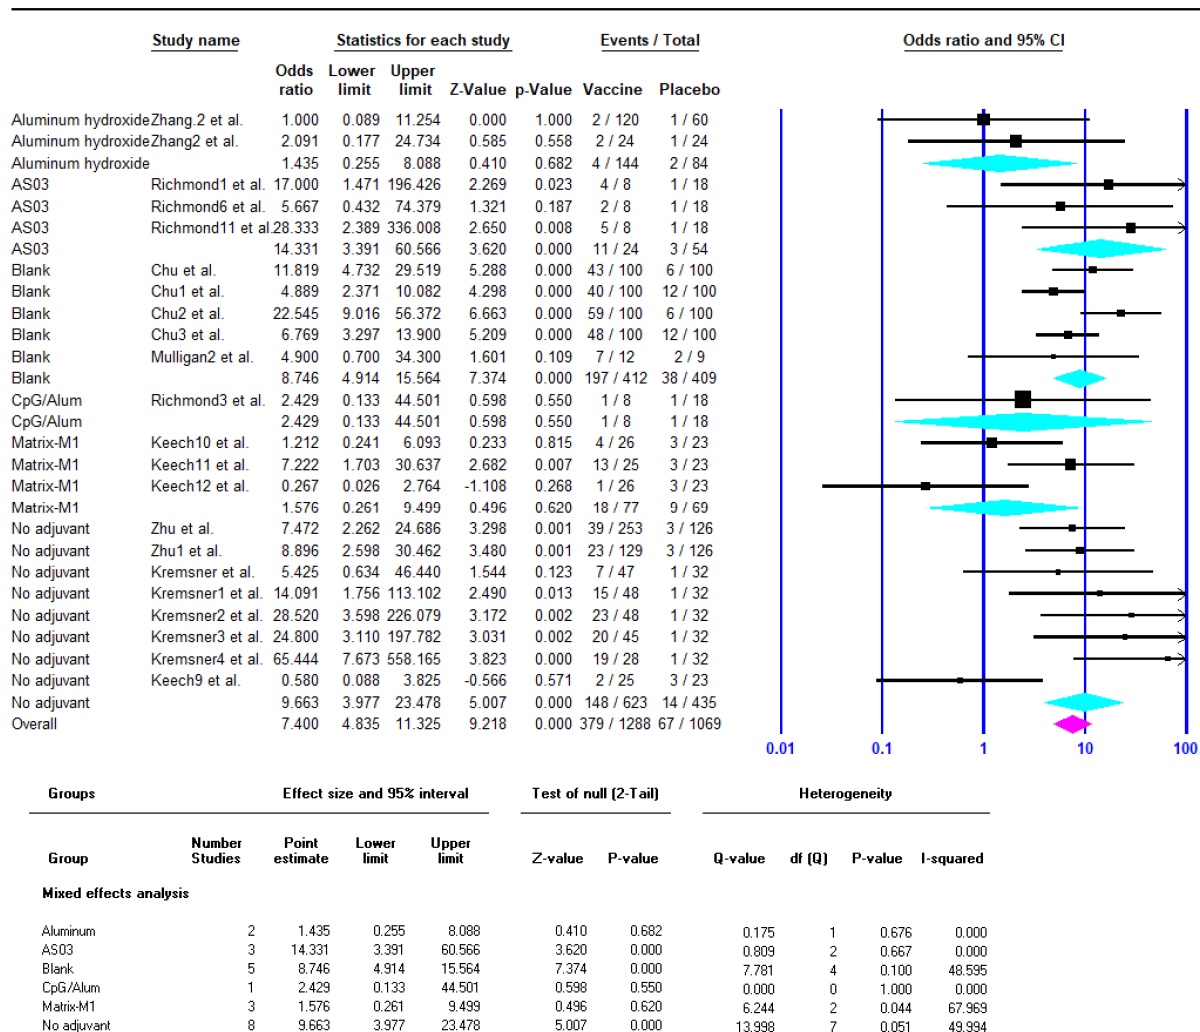

Fig S26. Meta-analysis A. Forest plot, B. Funnel plot for the Myalgia as a side effect based on the adjuvant type in phase 2/3 RCT

## Meta Analysis

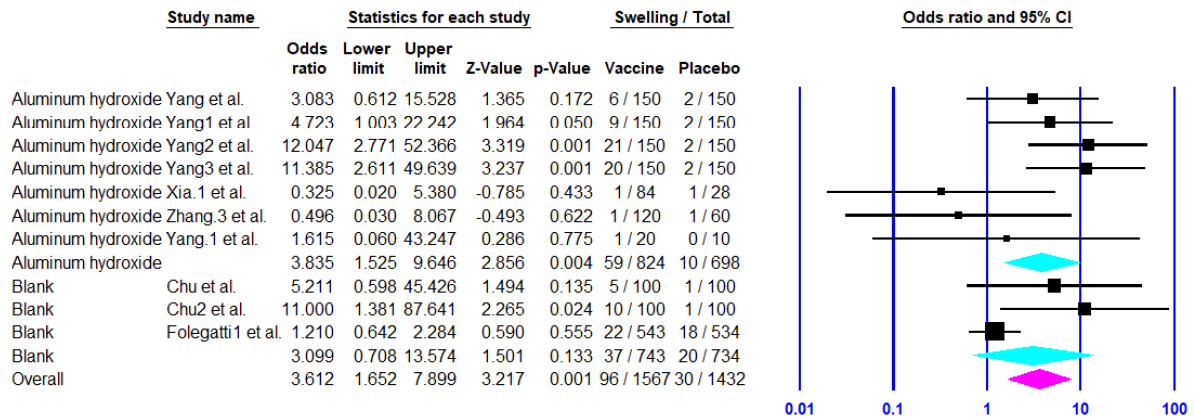

| Groups                 |                | Effect size and 95% interval |             |             | Test of null (2-Tail) |         | Heterogeneity |        |         |           |
|------------------------|----------------|------------------------------|-------------|-------------|-----------------------|---------|---------------|--------|---------|-----------|
| Group                  | Number Studies | Point estimate               | Lower limit | Upper limit | Z-value               | P-value | Q-value       | df (Q) | P-value | I-squared |
| Mixed effects analysis |                |                              |             |             |                       |         |               |        |         |           |
| Aluminum               | 7              | 3.835                        | 1.525       | 9.646       | 2.856                 | 0.004   | 9.604         | 6      | 0.142   | 37.527    |
| Blank                  | 3              | 3.099                        | 0.708       | 13.574      | 1.501                 | 0.133   | 5.199         | 2      | 0.074   | 61.532    |

**Fig S27. Meta-analysis A. Forest plot, B. Funnel plot for the Swelling as a side effect based on the adjuvant type in phase 2/3 RCT**

## Meta Analysis

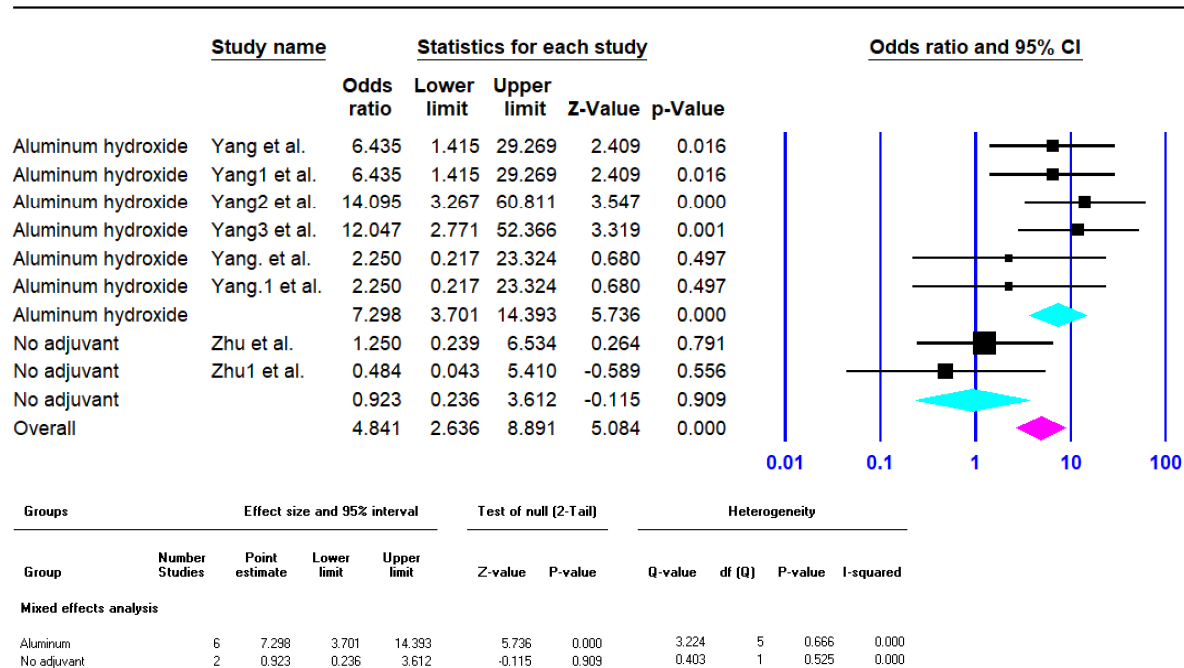

**Fig S28. Meta-analysis A. Forest plot, B. Funnel plot for the Redness as a side effect based on the adjuvant type in phase 2/3 RCT**

## Meta Analysis

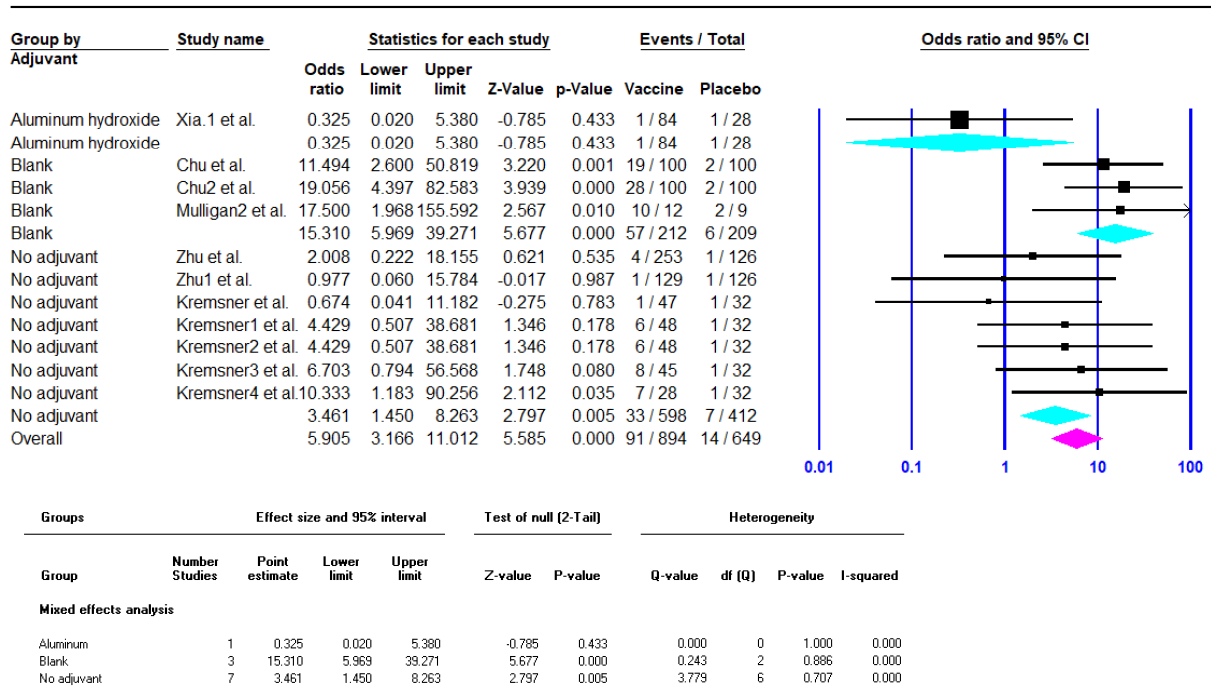

**Fig S29. Meta-analysis A. Forest plot, B. Funnel plot for the Vomiting as a side effect based on the adjuvant type in phase 2/3 RCT**

## Meta Analysis

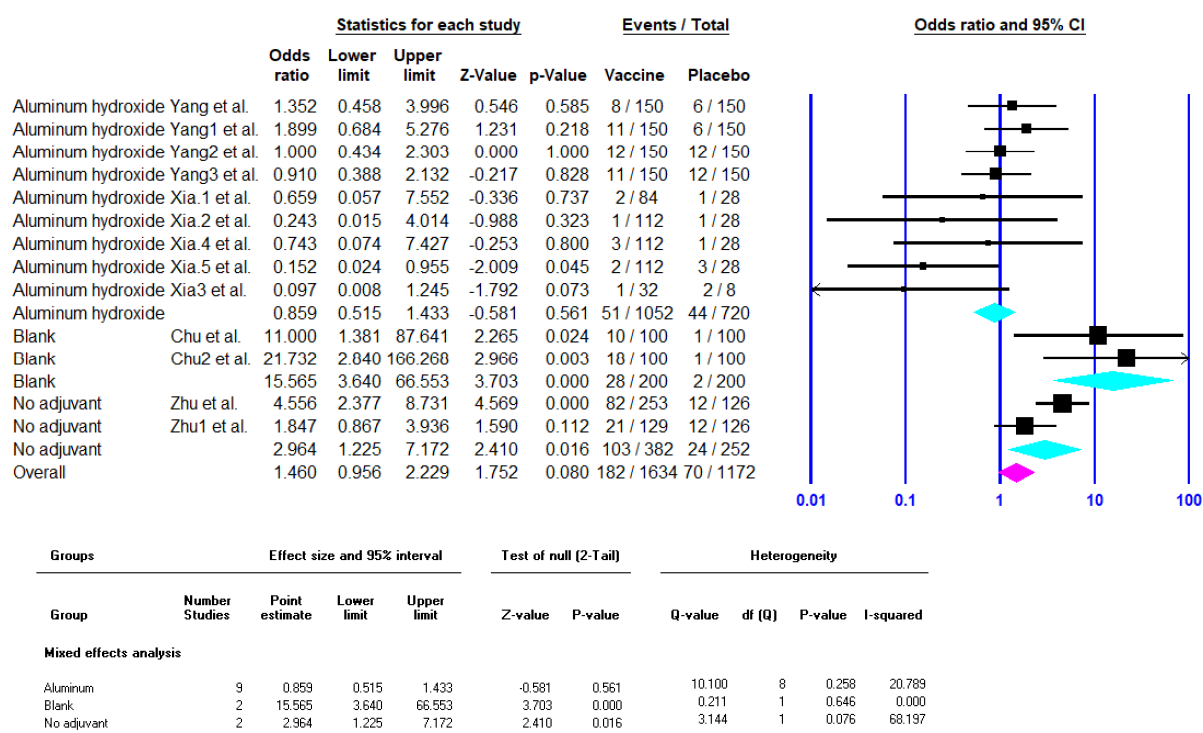

**Fig S30. Meta-analysis A. Forest plot, B. Funnel plot for the Fever as a side effect based on the adjuvant type in phase 2/3 RCT**
